# Supplementary material for: Hidden in plain sight: Varroa aggregate on adult drones of Apis mellifera
Source: Research Square preprint supplement (doi:10.21203/rs.3.rs-8444535/v1), 2026-01-08
Supplement: Supplementary file 1 [file be3aebf80c71a24ae9eba4db.xlsx]

## Sheet: Exp1
Trial	Time	Replicate	Host	Mites	NumberHosts
Lab1	48hr	Cage01	drone	2	2
Lab1	48hr	Cage01	drone	1	1
Lab1	48hr	Cage01	drone	0	2
Lab1	48hr	Cage01	worker	1	1
Lab1	48hr	Cage01	worker	0	4
Lab1	48hr	Cage02	drone	2	2
Lab1	48hr	Cage02	drone	1	2
Lab1	48hr	Cage02	drone	0	1
Lab1	48hr	Cage02	worker	1	3
Lab1	48hr	Cage02	worker	0	3
Lab1	48hr	Cage03	drone	2	3
Lab1	48hr	Cage03	drone	1	2
Lab1	48hr	Cage03	worker	1	1
Lab1	48hr	Cage03	worker	0	5
Lab1	48hr	Cage04	drone	2	1
Lab1	48hr	Cage04	drone	1	2
Lab1	48hr	Cage04	drone	0	3
Lab1	48hr	Cage04	worker	1	3
Lab1	48hr	Cage04	worker	0	1
Lab1	48hr	Cage06	drone	5	1
Lab1	48hr	Cage06	drone	1	1
Lab1	48hr	Cage06	drone	0	4
Lab1	48hr	Cage06	worker	1	2
Lab1	48hr	Cage06	worker	0	3
Lab1	48hr	Cage07	drone	2	1
Lab1	48hr	Cage07	drone	1	3
Lab1	48hr	Cage07	drone	0	2
Lab1	48hr	Cage07	worker	2	2
Lab1	48hr	Cage07	worker	1	2
Lab1	48hr	Cage07	worker	0	1
Lab1	48hr	Cage08	drone	2	1
Lab1	48hr	Cage08	drone	1	2
Lab1	48hr	Cage08	drone	0	2
Lab1	48hr	Cage08	worker	1	1
Lab1	48hr	Cage08	worker	0	4
Lab1	48hr	Cage09	drone	2	1
Lab1	48hr	Cage09	drone	1	2
Lab1	48hr	Cage09	drone	0	3
Lab1	48hr	Cage09	worker	1	4
Lab1	48hr	Cage09	worker	0	2
Lab1	48hr	Cage10	drone	2	2
Lab1	48hr	Cage10	drone	1	2
Lab1	48hr	Cage10	drone	0	2
Lab1	48hr	Cage10	worker	1	2
Lab1	48hr	Cage10	worker	0	3
Lab2	48hr	Cage19	drone	3	1
Lab2	48hr	Cage19	drone	2	1
Lab2	48hr	Cage19	drone	1	3
Lab2	48hr	Cage19	drone	0	1
Lab2	48hr	Cage19	worker	1	4
Lab2	48hr	Cage19	worker	0	2
Lab2	48hr	Cage20	drone	3	1
Lab2	48hr	Cage20	drone	2	1
Lab2	48hr	Cage20	drone	0	4
Lab2	48hr	Cage20	worker	0	6
Lab2	48hr	Cage11	drone	2	2
Lab2	48hr	Cage11	drone	1	2
Lab2	48hr	Cage11	drone	0	1
Lab2	48hr	Cage11	worker	1	3
Lab2	48hr	Cage11	worker	0	1
Lab2	48hr	Cage12	drone	2	1
Lab2	48hr	Cage12	drone	1	4
Lab2	48hr	Cage12	drone	0	1
Lab2	48hr	Cage12	worker	3	1
Lab2	48hr	Cage12	worker	1	1
Lab2	48hr	Cage12	worker	0	4
Lab2	48hr	Cage13	drone	2	1
Lab2	48hr	Cage13	drone	1	2
Lab2	48hr	Cage13	drone	0	2
Lab2	48hr	Cage13	worker	2	1
Lab2	48hr	Cage13	worker	1	3
Lab2	48hr	Cage13	worker	0	1
Lab2	48hr	Cage14	drone	2	1
Lab2	48hr	Cage14	drone	1	4
Lab2	48hr	Cage14	drone	0	1
Lab2	48hr	Cage14	worker	1	1
Lab2	48hr	Cage14	worker	0	1
Lab2	48hr	Cage15	drone	2	3
Lab2	48hr	Cage15	drone	1	1
Lab2	48hr	Cage15	drone	0	2
Lab2	48hr	Cage15	worker	2	2
Lab2	48hr	Cage15	worker	1	2
Lab2	48hr	Cage15	worker	0	2
Lab2	48hr	Cage16	drone	3	1
Lab2	48hr	Cage16	drone	2	2
Lab2	48hr	Cage16	drone	1	1
Lab2	48hr	Cage16	worker	2	1
Lab2	48hr	Cage16	worker	1	1
Lab2	48hr	Cage16	worker	0	4
Lab2	48hr	Cage17	drone	3	1
Lab2	48hr	Cage17	drone	1	3
Lab2	48hr	Cage17	worker	1	4
Lab2	48hr	Cage17	worker	0	2
Lab2	48hr	Cage18	drone	3	1
Lab2	48hr	Cage18	drone	2	1
Lab2	48hr	Cage18	drone	1	1
Lab2	48hr	Cage18	drone	0	3
Lab2	48hr	Cage18	worker	2	1
Lab2	48hr	Cage18	worker	1	1
Lab2	48hr	Cage18	worker	0	4
Lab3	48hr	Cage09	drone	2	2
Lab3	48hr	Cage09	drone	0	4
Lab3	48hr	Cage09	worker	2	1
Lab3	48hr	Cage09	worker	1	1
Lab3	48hr	Cage09	worker	0	2
Lab3	48hr	Cage05	drone	1	1
Lab3	48hr	Cage05	drone	0	5
Lab3	48hr	Cage05	worker	2	1
Lab3	48hr	Cage05	worker	1	1
Lab3	48hr	Cage05	worker	0	4
Lab3	48hr	Cage01	drone	1	2
Lab3	48hr	Cage01	drone	0	3
Lab3	48hr	Cage01	worker	3	1
Lab3	48hr	Cage01	worker	2	1
Lab3	48hr	Cage01	worker	1	1
Lab3	48hr	Cage01	worker	0	3
Lab3	48hr	Cage02	drone	1	2
Lab3	48hr	Cage02	drone	0	3
Lab3	48hr	Cage02	worker	2	2
Lab3	48hr	Cage02	worker	1	1
Lab3	48hr	Cage02	worker	0	2
Lab3	48hr	Cage04	drone	2	1
Lab3	48hr	Cage04	worker	1	1
Lab3	48hr	Cage04	worker	0	5
Lab3	48hr	Cage04	worker	2	2
Lab3	48hr	Cage04	worker	1	1
Lab3	48hr	Cage04	worker	0	2
Lab3	48hr	Cage06	drone	1	2
Lab3	48hr	Cage06	drone	0	4
Lab3	48hr	Cage06	worker	1	3
Lab3	48hr	Cage06	worker	4	0
Lab3	48hr	Cage07	drone	2	2
Lab3	48hr	Cage07	drone	1	1
Lab3	48hr	Cage07	drone	0	4
Lab3	48hr	Cage07	worker	1	3
Lab3	48hr	Cage07	worker	0	2
Lab3	48hr	Cage08	drone	1	3
Lab3	48hr	Cage08	drone	0	2
Lab3	48hr	Cage08	worker	3	1
Lab3	48hr	Cage08	worker	2	1
Lab3	48hr	Cage08	worker	0	5
Lab3	48hr	Cage10	drone	2	1
Lab3	48hr	Cage10	drone	1	3
Lab3	48hr	Cage10	drone	0	2
Lab3	48hr	Cage10	worker	2	1
Lab3	48hr	Cage10	worker	1	1
Lab3	48hr	Cage10	worker	0	4
Lab3	48hr	Cage03	drone	2	1
Lab3	48hr	Cage03	drone	1	4
Lab3	48hr	Cage03	drone	0	1
Lab3	48hr	Cage03	worker	2	1
Lab3	48hr	Cage03	worker	1	1
Lab3	48hr	Cage03	worker	0	3

## Sheet: EXP2
SampleNumber	Group	Color	Parasitized	Colony	Order	Sex	Age	Mite	Day	Mite1	Return	CoAndReturn	Gain	Loss	AlreadyPara	CoInfest
B0001	dronepara	blue	1	A	first	male	Age1	1	Day1	1	no	no				no
B0001	dronepara	blue	1	A	first	male	Age2									no
B0001	dronepara	blue	1	A	first	male	Age3	0	Day3	0				1		no
B0001	dronepara	blue	1	A	first	male	Age4	0	Day4	0				1		no
B0001	dronepara	blue	1	A	first	male	Age5									no
B0001	dronepara	blue	1	A	first	male	Age6									no
B0001	dronepara	blue	1	A	first	male	Age7									no
B0001	dronepara	blue	1	A	first	male	Age8									no
B0001	dronepara	blue	1	A	first	male	Age9									no
B0002	dronepara	blue	1	A	first	male	Age1	1	Day1	1	yes	no				no
B0002	dronepara	blue	1	A	first	male	Age2	0	Day2	0				1		no
B0002	dronepara	blue	1	A	first	male	Age3	0	Day3	0						no
B0002	dronepara	blue	1	A	first	male	Age4	1	Day4	1			1			no
B0002	dronepara	blue	1	A	first	male	Age5	0	Day5	0				1		no
B0002	dronepara	blue	1	A	first	male	Age6	0	Day6	0						no
B0002	dronepara	blue	1	A	first	male	Age7	0	Day7	0						no
B0002	dronepara	blue	1	A	first	male	Age8	0	Day8	0						no
B0002	dronepara	blue	1	A	first	male	Age9	0	Day9	0						no
B0003	dronepara	blue	1	A	first	male	Age1	1	Day1	1	no	no				no
B0003	dronepara	blue	1	A	first	male	Age2									no
B0003	dronepara	blue	1	A	first	male	Age3									no
B0003	dronepara	blue	1	A	first	male	Age4									no
B0003	dronepara	blue	1	A	first	male	Age5									no
B0003	dronepara	blue	1	A	first	male	Age6									no
B0003	dronepara	blue	1	A	first	male	Age7									no
B0003	dronepara	blue	1	A	first	male	Age8									no
B0003	dronepara	blue	1	A	first	male	Age9									no
B0004	dronepara	blue	1	A	first	male	Age1	2	Day1	2	no	no				yes
B0004	dronepara	blue	1	A	first	male	Age2	0	Day2	0				2		no
B0004	dronepara	blue	1	A	first	male	Age3									no
B0004	dronepara	blue	1	A	first	male	Age4									no
B0004	dronepara	blue	1	A	first	male	Age5									no
B0004	dronepara	blue	1	A	first	male	Age6									no
B0004	dronepara	blue	1	A	first	male	Age7									no
B0004	dronepara	blue	1	A	first	male	Age8									no
B0004	dronepara	blue	1	A	first	male	Age9									no
B0005	dronepara	blue	1	A	first	male	Age1	1	Day1	1						no
B0005	dronepara	blue	1	A	first	male	Age2	2	Day2	2	yes	yes	1			yes
B0005	dronepara	blue	1	A	first	male	Age3	0	Day3	0				2		no
B0005	dronepara	blue	1	A	first	male	Age4	0	Day4	0						no
B0005	dronepara	blue	1	A	first	male	Age5									no
B0005	dronepara	blue	1	A	first	male	Age6	0	Day6	0						no
B0005	dronepara	blue	1	A	first	male	Age7	0	Day7	0						no
B0005	dronepara	blue	1	A	first	male	Age8	0	Day8	0						no
B0005	dronepara	blue	1	A	first	male	Age9	0	Day9	0						no
B0006	dronepara	blue	1	A	first	male	Age1	1	Day1	1	no	no				no
B0006	dronepara	blue	1	A	first	male	Age2	0	Day2	0				1		no
B0006	dronepara	blue	1	A	first	male	Age3	0	Day3	0						no
B0006	dronepara	blue	1	A	first	male	Age4	0	Day4	0						no
B0006	dronepara	blue	1	A	first	male	Age5	0	Day5	0						no
B0006	dronepara	blue	1	A	first	male	Age6	0	Day6	0						no
B0006	dronepara	blue	1	A	first	male	Age7									no
B0006	dronepara	blue	1	A	first	male	Age8									no
B0006	dronepara	blue	1	A	first	male	Age9									no
B0007	dronepara	blue	1	A	first	male	Age1	1	Day1	1	no	no				no
B0007	dronepara	blue	1	A	first	male	Age2	0	Day2	0				1		no
B0007	dronepara	blue	1	A	first	male	Age3	0	Day3	0						no
B0007	dronepara	blue	1	A	first	male	Age4	0	Day4	0						no
B0007	dronepara	blue	1	A	first	male	Age5	0	Day5	0						no
B0007	dronepara	blue	1	A	first	male	Age6									no
B0007	dronepara	blue	1	A	first	male	Age7									no
B0007	dronepara	blue	1	A	first	male	Age8									no
B0007	dronepara	blue	1	A	first	male	Age9									no
B0008	dronepara	blue	1	A	first	male	Age1	2	Day1	2						yes
B0008	dronepara	blue	1	A	first	male	Age2	1	Day2	1				1		no
B0008	dronepara	blue	1	A	first	male	Age3	0	Day3	0				1		no
B0008	dronepara	blue	1	A	first	male	Age4									no
B0008	dronepara	blue	1	A	first	male	Age5	0	Day5	0						no
B0008	dronepara	blue	1	A	first	male	Age6	1	Day6	1	yes	yes	1			no
B0008	dronepara	blue	1	A	first	male	Age7									no
B0008	dronepara	blue	1	A	first	male	Age8									no
B0008	dronepara	blue	1	A	first	male	Age9									no
B0009	dronepara	blue	1	A	first	male	Age1	1	Day1	1						no
B0009	dronepara	blue	1	A	first	male	Age2	2	Day2	2			1			yes
B0009	dronepara	blue	1	A	first	male	Age3	2	Day3	2						yes
B0009	dronepara	blue	1	A	first	male	Age4	0	Day4	0				2		no
B0009	dronepara	blue	1	A	first	male	Age5	0	Day5	0						no
B0009	dronepara	blue	1	A	first	male	Age6	1	Day6	1	yes	yes	1			no
B0009	dronepara	blue	1	A	first	male	Age7	0	Day7	0				1		no
B0009	dronepara	blue	1	A	first	male	Age8	0	Day8	0						no
B0009	dronepara	blue	1	A	first	male	Age9	0	Day9	0						no
B0010	dronepara	blue	1	A	first	male	Age1	1	Day1	1	no	no				no
B0010	dronepara	blue	1	A	first	male	Age2	0	Day2	0				1		no
B0010	dronepara	blue	1	A	first	male	Age3	0	Day3	0						no
B0010	dronepara	blue	1	A	first	male	Age4	0	Day4	0						no
B0010	dronepara	blue	1	A	first	male	Age5									no
B0010	dronepara	blue	1	A	first	male	Age6									no
B0010	dronepara	blue	1	A	first	male	Age7									no
B0010	dronepara	blue	1	A	first	male	Age8									no
B0010	dronepara	blue	1	A	first	male	Age9									no
B0011	dronepara	blue	1	A	first	male	Age1	2	Day1	2	no	no				yes
B0011	dronepara	blue	1	A	first	male	Age2	0	Day2	0				2		no
B0011	dronepara	blue	1	A	first	male	Age3	0	Day3	0						no
B0011	dronepara	blue	1	A	first	male	Age4	0	Day4	0						no
B0011	dronepara	blue	1	A	first	male	Age5	0	Day5	0						no
B0011	dronepara	blue	1	A	first	male	Age6	0	Day6	0						no
B0011	dronepara	blue	1	A	first	male	Age7	0	Day7	0						no
B0011	dronepara	blue	1	A	first	male	Age8	0	Day8	0						no
B0011	dronepara	blue	1	A	first	male	Age9	0	Day9	0						no
B0012	dronepara	blue	1	A	first	male	Age1	1	Day1	1	no	no				no
B0012	dronepara	blue	1	A	first	male	Age2	1	Day2	1						no
B0012	dronepara	blue	1	A	first	male	Age3	0	Day3	0				1		no
B0012	dronepara	blue	1	A	first	male	Age4	0	Day4	0						no
B0012	dronepara	blue	1	A	first	male	Age5									no
B0012	dronepara	blue	1	A	first	male	Age6									no
B0012	dronepara	blue	1	A	first	male	Age7									no
B0012	dronepara	blue	1	A	first	male	Age8									no
B0012	dronepara	blue	1	A	first	male	Age9									no
B0013	dronepara	blue	1	A	first	male	Age1	2	Day1	2	no	no				yes
B0013	dronepara	blue	1	A	first	male	Age2	0	Day2	0				2		no
B0013	dronepara	blue	1	A	first	male	Age3	0	Day3	0						no
B0013	dronepara	blue	1	A	first	male	Age4	0	Day4	0						no
B0013	dronepara	blue	1	A	first	male	Age5	0	Day5	0						no
B0013	dronepara	blue	1	A	first	male	Age6									no
B0013	dronepara	blue	1	A	first	male	Age7	0	Day7	0						no
B0013	dronepara	blue	1	A	first	male	Age8	0	Day8	0						no
B0013	dronepara	blue	1	A	first	male	Age9	0	Day9	0						no
B0014	dronepara	blue	1	A	first	male	Age1	1	Day1	1	no	no				no
B0014	dronepara	blue	1	A	first	male	Age2									no
B0014	dronepara	blue	1	A	first	male	Age3	0	Day3	0						no
B0014	dronepara	blue	1	A	first	male	Age4	0	Day4	0						no
B0014	dronepara	blue	1	A	first	male	Age5									no
B0014	dronepara	blue	1	A	first	male	Age6									no
B0014	dronepara	blue	1	A	first	male	Age7									no
B0014	dronepara	blue	1	A	first	male	Age8									no
B0014	dronepara	blue	1	A	first	male	Age9									no
B0015	dronepara	blue	1	A	first	male	Age1	2	Day1	2	no	no				yes
B0015	dronepara	blue	1	A	first	male	Age2	0	Day2	0				2		no
B0015	dronepara	blue	1	A	first	male	Age3	0	Day3	0						no
B0015	dronepara	blue	1	A	first	male	Age4	0	Day4	0						no
B0015	dronepara	blue	1	A	first	male	Age5	0	Day5	0						no
B0015	dronepara	blue	1	A	first	male	Age6	0	Day6	0						no
B0015	dronepara	blue	1	A	first	male	Age7	0	Day7	0						no
B0015	dronepara	blue	1	A	first	male	Age8									no
B0015	dronepara	blue	1	A	first	male	Age9	0	Day9	0						no
B0016	dronepara	blue	1	A	first	male	Age1	1	Day1	1	no	no				no
B0016	dronepara	blue	1	A	first	male	Age2	0	Day2	0				1		no
B0016	dronepara	blue	1	A	first	male	Age3	0	Day3	0						no
B0016	dronepara	blue	1	A	first	male	Age4	0	Day4	0						no
B0016	dronepara	blue	1	A	first	male	Age5	0	Day5	0						no
B0016	dronepara	blue	1	A	first	male	Age6									no
B0016	dronepara	blue	1	A	first	male	Age7									no
B0016	dronepara	blue	1	A	first	male	Age8									no
B0016	dronepara	blue	1	A	first	male	Age9									no
B0017	dronepara	yellow	1	A	first	male	Age1	1	Day2	1						no
B0017	dronepara	yellow	1	A	first	male	Age2	0	Day3	0				1		no
B0017	dronepara	yellow	1	A	first	male	Age3	0	Day4	0						no
B0017	dronepara	yellow	1	A	first	male	Age4	0	Day5	0						no
B0017	dronepara	yellow	1	A	first	male	Age5	1	Day6	1	yes	no	1			no
B0017	dronepara	yellow	1	A	first	male	Age6	0	Day7	0				1		no
B0017	dronepara	yellow	1	A	first	male	Age7	0	Day8	0						no
B0017	dronepara	yellow	1	A	first	male	Age8	0	Day9	0						no
B0017	dronepara	yellow	1	A	first	male	Age9									no
B0018	dronepara	yellow	1	A	first	male	Age1	1	Day2	1						no
B0018	dronepara	yellow	1	A	first	male	Age2	0	Day3	0				1		no
B0018	dronepara	yellow	1	A	first	male	Age3	1	Day4	1	yes	no	1			no
B0018	dronepara	yellow	1	A	first	male	Age4	0	Day5	0						no
B0018	dronepara	yellow	1	A	first	male	Age5	1	Day6	1			1			no
B0018	dronepara	yellow	1	A	first	male	Age6	0	Day7	0				1		no
B0018	dronepara	yellow	1	A	first	male	Age7	0	Day8	0						no
B0018	dronepara	yellow	1	A	first	male	Age8									no
B0018	dronepara	yellow	1	A	first	male	Age9									no
B0019	dronepara	yellow	1	A	first	male	Age1	1	Day2	1	no	no				no
B0019	dronepara	yellow	1	A	first	male	Age2									no
B0019	dronepara	yellow	1	A	first	male	Age3									no
B0019	dronepara	yellow	1	A	first	male	Age4									no
B0019	dronepara	yellow	1	A	first	male	Age5									no
B0019	dronepara	yellow	1	A	first	male	Age6									no
B0019	dronepara	yellow	1	A	first	male	Age7									no
B0019	dronepara	yellow	1	A	first	male	Age8									no
B0019	dronepara	yellow	1	A	first	male	Age9									no
B0020	dronepara	yellow	1	A	first	male	Age1	1	Day2	1	no	no				no
B0020	dronepara	yellow	1	A	first	male	Age2									no
B0020	dronepara	yellow	1	A	first	male	Age3									no
B0020	dronepara	yellow	1	A	first	male	Age4									no
B0020	dronepara	yellow	1	A	first	male	Age5									no
B0020	dronepara	yellow	1	A	first	male	Age6									no
B0020	dronepara	yellow	1	A	first	male	Age7									no
B0020	dronepara	yellow	1	A	first	male	Age8									no
B0020	dronepara	yellow	1	A	first	male	Age9									no
B0021	dronepara	yellow	1	A	first	male	Age1	1	Day2	1	no	no				no
B0021	dronepara	yellow	1	A	first	male	Age2									no
B0021	dronepara	yellow	1	A	first	male	Age3									no
B0021	dronepara	yellow	1	A	first	male	Age4									no
B0021	dronepara	yellow	1	A	first	male	Age5									no
B0021	dronepara	yellow	1	A	first	male	Age6									no
B0021	dronepara	yellow	1	A	first	male	Age7									no
B0021	dronepara	yellow	1	A	first	male	Age8									no
B0021	dronepara	yellow	1	A	first	male	Age9									no
B0022	dronepara	yellow	1	A	first	male	Age1	1	Day2	1	no	no				no
B0022	dronepara	yellow	1	A	first	male	Age2	1	Day3	1						no
B0022	dronepara	yellow	1	A	first	male	Age3	0	Day4	0				1		no
B0022	dronepara	yellow	1	A	first	male	Age4	0	Day5	0						no
B0022	dronepara	yellow	1	A	first	male	Age5	0	Day6	0						no
B0022	dronepara	yellow	1	A	first	male	Age6	0	Day7	0						no
B0022	dronepara	yellow	1	A	first	male	Age7	0	Day8	0						no
B0022	dronepara	yellow	1	A	first	male	Age8	0	Day9	0						no
B0022	dronepara	yellow	1	A	first	male	Age9									no
B0023	dronepara	yellow	1	A	first	male	Age1	2	Day2	2	no	no				yes
B0023	dronepara	yellow	1	A	first	male	Age2	0	Day3	0				2		no
B0023	dronepara	yellow	1	A	first	male	Age3									no
B0023	dronepara	yellow	1	A	first	male	Age4	0	Day5	0						no
B0023	dronepara	yellow	1	A	first	male	Age5	0	Day6	0						no
B0023	dronepara	yellow	1	A	first	male	Age6	0	Day7	0						no
B0023	dronepara	yellow	1	A	first	male	Age7	0	Day8	0						no
B0023	dronepara	yellow	1	A	first	male	Age8	0	Day9	0						no
B0023	dronepara	yellow	1	A	first	male	Age9									no
B0024	dronepara	yellow	1	A	first	male	Age1	1	Day2	1	no	no				no
B0024	dronepara	yellow	1	A	first	male	Age2	0	Day3	0				1		no
B0024	dronepara	yellow	1	A	first	male	Age3									no
B0024	dronepara	yellow	1	A	first	male	Age4	0	Day5	0						no
B0024	dronepara	yellow	1	A	first	male	Age5	0	Day6	0						no
B0024	dronepara	yellow	1	A	first	male	Age6	0	Day7	0						no
B0024	dronepara	yellow	1	A	first	male	Age7	0	Day8	0						no
B0024	dronepara	yellow	1	A	first	male	Age8	0	Day9	0						no
B0024	dronepara	yellow	1	A	first	male	Age9									no
B0025	dronepara	yellow	1	A	first	male	Age1	1	Day2	1						no
B0025	dronepara	yellow	1	A	first	male	Age2	0	Day3	0				1		no
B0025	dronepara	yellow	1	A	first	male	Age3	0	Day4	0						no
B0025	dronepara	yellow	1	A	first	male	Age4	0	Day5	0						no
B0025	dronepara	yellow	1	A	first	male	Age5									no
B0025	dronepara	yellow	1	A	first	male	Age6	1	Day7	1	yes	no				no
B0025	dronepara	yellow	1	A	first	male	Age7	0	Day8	0				1		no
B0025	dronepara	yellow	1	A	first	male	Age8	0	Day9	0						no
B0025	dronepara	yellow	1	A	first	male	Age9									no
B0026	dronepara	yellow	1	A	first	male	Age1	1	Day2	1	no	no				no
B0026	dronepara	yellow	1	A	first	male	Age2	1	Day3	1						no
B0026	dronepara	yellow	1	A	first	male	Age3	1	Day4	1						no
B0026	dronepara	yellow	1	A	first	male	Age4									no
B0026	dronepara	yellow	1	A	first	male	Age5									no
B0026	dronepara	yellow	1	A	first	male	Age6									no
B0026	dronepara	yellow	1	A	first	male	Age7									no
B0026	dronepara	yellow	1	A	first	male	Age8									no
B0026	dronepara	yellow	1	A	first	male	Age9									no
B0027	dronepara	yellow	1	A	first	male	Age1	2	Day2	2						yes
B0027	dronepara	yellow	1	A	first	male	Age2	2	Day3	2						yes
B0027	dronepara	yellow	1	A	first	male	Age3	2	Day4	2						yes
B0027	dronepara	yellow	1	A	first	male	Age4	1	Day5	1				1		no
B0027	dronepara	yellow	1	A	first	male	Age5	0	Day6	0						no
B0027	dronepara	yellow	1	A	first	male	Age6	1	Day7	1	yes	yes	1			no
B0027	dronepara	yellow	1	A	first	male	Age7	0	Day8	0						no
B0027	dronepara	yellow	1	A	first	male	Age8	0	Day9	0						no
B0027	dronepara	yellow	1	A	first	male	Age9									no
B0028	dronepara	yellow	1	A	first	male	Age1	1	Day2	1	no	no				no
B0028	dronepara	yellow	1	A	first	male	Age2									no
B0028	dronepara	yellow	1	A	first	male	Age3									no
B0028	dronepara	yellow	1	A	first	male	Age4									no
B0028	dronepara	yellow	1	A	first	male	Age5									no
B0028	dronepara	yellow	1	A	first	male	Age6									no
B0028	dronepara	yellow	1	A	first	male	Age7									no
B0028	dronepara	yellow	1	A	first	male	Age8									no
B0028	dronepara	yellow	1	A	first	male	Age9									no
B0029	dronepara	yellow	1	A	first	male	Age1	3	Day2	3						yes
B0029	dronepara	yellow	1	A	first	male	Age2	1	Day3	1				2		no
B0029	dronepara	yellow	1	A	first	male	Age3									no
B0029	dronepara	yellow	1	A	first	male	Age4	0	Day5	0				1		no
B0029	dronepara	yellow	1	A	first	male	Age5	1	Day6	1	yes	yes	1			no
B0029	dronepara	yellow	1	A	first	male	Age6	0	Day7	0				1		no
B0029	dronepara	yellow	1	A	first	male	Age7									no
B0029	dronepara	yellow	1	A	first	male	Age8									no
B0029	dronepara	yellow	1	A	first	male	Age9									no
B0030	dronepara	yellow	1	A	first	male	Age1	2	Day2	2						yes
B0030	dronepara	yellow	1	A	first	male	Age2	0	Day3	0				2		no
B0030	dronepara	yellow	1	A	first	male	Age3	1	Day4	1	yes	yes	1			no
B0030	dronepara	yellow	1	A	first	male	Age4	0	Day5	0				1		no
B0030	dronepara	yellow	1	A	first	male	Age5	0	Day6	0						no
B0030	dronepara	yellow	1	A	first	male	Age6	0	Day7	0						no
B0030	dronepara	yellow	1	A	first	male	Age7	0	Day8	0						no
B0030	dronepara	yellow	1	A	first	male	Age8	0	Day9	0						no
B0030	dronepara	yellow	1	A	first	male	Age9									no
B0031	dronepara	yellow	1	A	first	male	Age1	2	Day2	2	no	no				yes
B0031	dronepara	yellow	1	A	first	male	Age2									no
B0031	dronepara	yellow	1	A	first	male	Age3									no
B0031	dronepara	yellow	1	A	first	male	Age4									no
B0031	dronepara	yellow	1	A	first	male	Age5									no
B0031	dronepara	yellow	1	A	first	male	Age6									no
B0031	dronepara	yellow	1	A	first	male	Age7									no
B0031	dronepara	yellow	1	A	first	male	Age8									no
B0031	dronepara	yellow	1	A	first	male	Age9									no
B0032	dronepara	yellow	1	A	first	male	Age1	1	Day2	1						no
B0032	dronepara	yellow	1	A	first	male	Age2	1	Day3	1						no
B0032	dronepara	yellow	1	A	first	male	Age3	0	Day4	0				1		no
B0032	dronepara	yellow	1	A	first	male	Age4	0	Day5	0						no
B0032	dronepara	yellow	1	A	first	male	Age5	0	Day6	0						no
B0032	dronepara	yellow	1	A	first	male	Age6	2	Day7	2	yes	yes	2			yes
B0032	dronepara	yellow	1	A	first	male	Age7	1	Day8	1				1		no
B0032	dronepara	yellow	1	A	first	male	Age8	0	Day9	0				1		no
B0032	dronepara	yellow	1	A	first	male	Age9									no
B0033	dronepara	yellow	1	A	first	male	Age1	3	Day2	3
B0033	dronepara	yellow	1	A	first	male	Age2	0	Day3	0				3		no
B0033	dronepara	yellow	1	A	first	male	Age3	2	Day4	2	yes	yes	2			yes
B0033	dronepara	yellow	1	A	first	male	Age4	0	Day5	0				2		no
B0033	dronepara	yellow	1	A	first	male	Age5	0	Day6	0						no
B0033	dronepara	yellow	1	A	first	male	Age6	0	Day7	0						no
B0033	dronepara	yellow	1	A	first	male	Age7	0	Day8	0						no
B0033	dronepara	yellow	1	A	first	male	Age8	0	Day9	0						no
B0033	dronepara	yellow	1	A	first	male	Age9									no
B0034	dronepara	yellow	1	A	first	male	Age1	3	Day2	3	no	no				yes
B0034	dronepara	yellow	1	A	first	male	Age2	1	Day3	1				2		no
B0034	dronepara	yellow	1	A	first	male	Age3	0	Day4	0				1		no
B0034	dronepara	yellow	1	A	first	male	Age4	0	Day5	0						no
B0034	dronepara	yellow	1	A	first	male	Age5	0	Day6	0						no
B0034	dronepara	yellow	1	A	first	male	Age6									no
B0034	dronepara	yellow	1	A	first	male	Age7									no
B0034	dronepara	yellow	1	A	first	male	Age8									no
B0034	dronepara	yellow	1	A	first	male	Age9									no
B0035	dronepara	yellow	1	A	first	male	Age1	3	Day2	3	no	no				yes
B0035	dronepara	yellow	1	A	first	male	Age2	0	Day3	0				3		no
B0035	dronepara	yellow	1	A	first	male	Age3	0	Day4	0						no
B0035	dronepara	yellow	1	A	first	male	Age4	0	Day5	0						no
B0035	dronepara	yellow	1	A	first	male	Age5	0	Day6	0						no
B0035	dronepara	yellow	1	A	first	male	Age6	0	Day7	0						no
B0035	dronepara	yellow	1	A	first	male	Age7									no
B0035	dronepara	yellow	1	A	first	male	Age8	0	Day9	0						no
B0035	dronepara	yellow	1	A	first	male	Age9									no
B0036	dronepara	white	1	A	first	male	Age1	2	Day3	2	no	no				yes
B0036	dronepara	white	1	A	first	male	Age2	2	Day4	2						yes
B0036	dronepara	white	1	A	first	male	Age3	0	Day5	0				2		no
B0036	dronepara	white	1	A	first	male	Age4	0	Day6	0						no
B0036	dronepara	white	1	A	first	male	Age5	0	Day7	0						no
B0036	dronepara	white	1	A	first	male	Age6	0	Day8	0						no
B0036	dronepara	white	1	A	first	male	Age7	0	Day9	0						no
B0036	dronepara	white	1	A	first	male	Age8									no
B0036	dronepara	white	1	A	first	male	Age9									no
B0037	dronepara	white	1	A	first	male	Age1	1	Day3	1	no	no				no
B0037	dronepara	white	1	A	first	male	Age2	0	Day4	0				1		no
B0037	dronepara	white	1	A	first	male	Age3	0	Day5	0						no
B0037	dronepara	white	1	A	first	male	Age4	0	Day6	0						no
B0037	dronepara	white	1	A	first	male	Age5	0	Day7	0						no
B0037	dronepara	white	1	A	first	male	Age6									no
B0037	dronepara	white	1	A	first	male	Age7									no
B0037	dronepara	white	1	A	first	male	Age8									no
B0037	dronepara	white	1	A	first	male	Age9									no
B0038	dronepara	white	1	A	first	male	Age1	1	Day3	1	no	no				no
B0038	dronepara	white	1	A	first	male	Age2	0	Day4	0				1		no
B0038	dronepara	white	1	A	first	male	Age3	0	Day5	0						no
B0038	dronepara	white	1	A	first	male	Age4	0	Day6	0						no
B0038	dronepara	white	1	A	first	male	Age5	0	Day7	0						no
B0038	dronepara	white	1	A	first	male	Age6	0	Day8	0						no
B0038	dronepara	white	1	A	first	male	Age7	0	Day9	0						no
B0038	dronepara	white	1	A	first	male	Age8									no
B0038	dronepara	white	1	A	first	male	Age9									no
B0039	dronepara	white	1	A	first	male	Age1	3	Day3	3	no	no				yes
B0039	dronepara	white	1	A	first	male	Age2	0	Day4	0				3		no
B0039	dronepara	white	1	A	first	male	Age3	0	Day5	0						no
B0039	dronepara	white	1	A	first	male	Age4									no
B0039	dronepara	white	1	A	first	male	Age5									no
B0039	dronepara	white	1	A	first	male	Age6									no
B0039	dronepara	white	1	A	first	male	Age7									no
B0039	dronepara	white	1	A	first	male	Age8									no
B0039	dronepara	white	1	A	first	male	Age9									no
B0040	dronepara	white	1	A	first	male	Age1	2	Day3	2	no	no				yes
B0040	dronepara	white	1	A	first	male	Age2	1	Day4	1				1		no
B0040	dronepara	white	1	A	first	male	Age3	0	Day5	0				1		no
B0040	dronepara	white	1	A	first	male	Age4	0	Day6	0						no
B0040	dronepara	white	1	A	first	male	Age5	0	Day7	0						no
B0040	dronepara	white	1	A	first	male	Age6	0	Day8	0						no
B0040	dronepara	white	1	A	first	male	Age7	0	Day9	0						no
B0040	dronepara	white	1	A	first	male	Age8									no
B0040	dronepara	white	1	A	first	male	Age9									no
B0041	dronepara	white	1	A	first	male	Age1	1	Day3	1	no	no				no
B0041	dronepara	white	1	A	first	male	Age2	0	Day4	0				1		no
B0041	dronepara	white	1	A	first	male	Age3	0	Day5	0						no
B0041	dronepara	white	1	A	first	male	Age4	0	Day6	0						no
B0041	dronepara	white	1	A	first	male	Age5	0	Day7	0						no
B0041	dronepara	white	1	A	first	male	Age6									no
B0041	dronepara	white	1	A	first	male	Age7									no
B0041	dronepara	white	1	A	first	male	Age8									no
B0041	dronepara	white	1	A	first	male	Age9									no
B0042	dronepara	white	1	A	first	male	Age1	1	Day3	1						no
B0042	dronepara	white	1	A	first	male	Age2	4	Day4	4	yes	yes	3			yes
B0042	dronepara	white	1	A	first	male	Age3									no
B0042	dronepara	white	1	A	first	male	Age4									no
B0042	dronepara	white	1	A	first	male	Age5									no
B0042	dronepara	white	1	A	first	male	Age6									no
B0042	dronepara	white	1	A	first	male	Age7									no
B0042	dronepara	white	1	A	first	male	Age8									no
B0042	dronepara	white	1	A	first	male	Age9									no
B0043	dronepara	white	1	A	first	male	Age1	2	Day3	2						yes
B0043	dronepara	white	1	A	first	male	Age2	0	Day4	0				2		no
B0043	dronepara	white	1	A	first	male	Age3	1	Day5	1	yes	yes	1			no
B0043	dronepara	white	1	A	first	male	Age4	0	Day6	0				1		no
B0043	dronepara	white	1	A	first	male	Age5	0	Day7	0						no
B0043	dronepara	white	1	A	first	male	Age6	0	Day8	0						no
B0043	dronepara	white	1	A	first	male	Age7	0	Day9	0						no
B0043	dronepara	white	1	A	first	male	Age8									no
B0043	dronepara	white	1	A	first	male	Age9									no
B0044	dronepara	white	1	A	first	male	Age1	1	Day3	1	no	no				no
B0044	dronepara	white	1	A	first	male	Age2	1	Day4	1						no
B0044	dronepara	white	1	A	first	male	Age3	0	Day5	0				1		no
B0044	dronepara	white	1	A	first	male	Age4	0	Day6	0						no
B0044	dronepara	white	1	A	first	male	Age5	0	Day7	0						no
B0044	dronepara	white	1	A	first	male	Age6	0	Day8	0						no
B0044	dronepara	white	1	A	first	male	Age7	0	Day9	0						no
B0044	dronepara	white	1	A	first	male	Age8									no
B0044	dronepara	white	1	A	first	male	Age9									no
B0045	dronepara	white	1	A	first	male	Age1	3	Day3	3	no	no				yes
B0045	dronepara	white	1	A	first	male	Age2	0	Day4	0				3		no
B0045	dronepara	white	1	A	first	male	Age3	0	Day5	0						no
B0045	dronepara	white	1	A	first	male	Age4	0	Day6	0						no
B0045	dronepara	white	1	A	first	male	Age5	0	Day7	0						no
B0045	dronepara	white	1	A	first	male	Age6									no
B0045	dronepara	white	1	A	first	male	Age7									no
B0045	dronepara	white	1	A	first	male	Age8									no
B0045	dronepara	white	1	A	first	male	Age9									no
B0046	dronepara	white	1	A	first	male	Age1	2	Day3	2	no	no				yes
B0046	dronepara	white	1	A	first	male	Age2									no
B0046	dronepara	white	1	A	first	male	Age3									no
B0046	dronepara	white	1	A	first	male	Age4									no
B0046	dronepara	white	1	A	first	male	Age5									no
B0046	dronepara	white	1	A	first	male	Age6									no
B0046	dronepara	white	1	A	first	male	Age7									no
B0046	dronepara	white	1	A	first	male	Age8									no
B0046	dronepara	white	1	A	first	male	Age9									no
B0047	dronepara	white	1	A	first	male	Age1	1	Day3	1						no
B0047	dronepara	white	1	A	first	male	Age2	0	Day4	0				1		no
B0047	dronepara	white	1	A	first	male	Age3	0	Day5	0						no
B0047	dronepara	white	1	A	first	male	Age4	1	Day6	1	yes	no	1			no
B0047	dronepara	white	1	A	first	male	Age5	0	Day7	0				1		no
B0047	dronepara	white	1	A	first	male	Age6									no
B0047	dronepara	white	1	A	first	male	Age7									no
B0047	dronepara	white	1	A	first	male	Age8									no
B0047	dronepara	white	1	A	first	male	Age9									no
B0048	dronepara	white	1	A	first	male	Age1	1	Day3	1	no	no				no
B0048	dronepara	white	1	A	first	male	Age2	0	Day4	0				1		no
B0048	dronepara	white	1	A	first	male	Age3	0	Day5	0						no
B0048	dronepara	white	1	A	first	male	Age4	0	Day6	0						no
B0048	dronepara	white	1	A	first	male	Age5	0	Day7	0						no
B0048	dronepara	white	1	A	first	male	Age6	0	Day8	0						no
B0048	dronepara	white	1	A	first	male	Age7	0	Day9	0						no
B0048	dronepara	white	1	A	first	male	Age8									no
B0048	dronepara	white	1	A	first	male	Age9									no
B0049	dronepara	white	1	A	first	male	Age1	1	Day3	1						no
B0049	dronepara	white	1	A	first	male	Age2	3	Day4	3	yes	yes	2			yes
B0049	dronepara	white	1	A	first	male	Age3	0	Day5	0				3		no
B0049	dronepara	white	1	A	first	male	Age4	0	Day6	0						no
B0049	dronepara	white	1	A	first	male	Age5	1	Day7	1			1			no
B0049	dronepara	white	1	A	first	male	Age6	1	Day8	1						no
B0049	dronepara	white	1	A	first	male	Age7	0	Day9	0				1		no
B0049	dronepara	white	1	A	first	male	Age8									no
B0049	dronepara	white	1	A	first	male	Age9									no
B0050	dronepara	white	1	A	first	male	Age1	2	Day3	2	no	no				yes
B0050	dronepara	white	1	A	first	male	Age2	0	Day4	0				2		no
B0050	dronepara	white	1	A	first	male	Age3	0	Day5	0						no
B0050	dronepara	white	1	A	first	male	Age4	0	Day6	0						no
B0050	dronepara	white	1	A	first	male	Age5	0	Day7	0						no
B0050	dronepara	white	1	A	first	male	Age6	0	Day8	0						no
B0050	dronepara	white	1	A	first	male	Age7	0	Day9	0						no
B0050	dronepara	white	1	A	first	male	Age8									no
B0050	dronepara	white	1	A	first	male	Age9									no
B0051	dronepara	white	1	A	first	male	Age1	4	Day3	4	no	no				yes
B0051	dronepara	white	1	A	first	male	Age2	1	Day4	1				3		no
B0051	dronepara	white	1	A	first	male	Age3	0	Day5	0				1		no
B0051	dronepara	white	1	A	first	male	Age4	0	Day6	0						no
B0051	dronepara	white	1	A	first	male	Age5	0	Day7	0						no
B0051	dronepara	white	1	A	first	male	Age6	0	Day8	0						no
B0051	dronepara	white	1	A	first	male	Age7									no
B0051	dronepara	white	1	A	first	male	Age8									no
B0051	dronepara	white	1	A	first	male	Age9									no
B0052	dronepara	white	1	A	first	male	Age1	2	Day3	2	no	no				yes
B0052	dronepara	white	1	A	first	male	Age2	0	Day4	0				2		no
B0052	dronepara	white	1	A	first	male	Age3	0	Day5	0						no
B0052	dronepara	white	1	A	first	male	Age4	0	Day6	0						no
B0052	dronepara	white	1	A	first	male	Age5	0	Day7	0						no
B0052	dronepara	white	1	A	first	male	Age6	0	Day8	0						no
B0052	dronepara	white	1	A	first	male	Age7	0	Day9	0						no
B0052	dronepara	white	1	A	first	male	Age8									no
B0052	dronepara	white	1	A	first	male	Age9									no
B0053	dronepara	white	1	A	first	male	Age1	3	Day3	3	no	no				yes
B0053	dronepara	white	1	A	first	male	Age2	1	Day4	1				2		no
B0053	dronepara	white	1	A	first	male	Age3	1	Day5	1						no
B0053	dronepara	white	1	A	first	male	Age4	0	Day6	0				1		no
B0053	dronepara	white	1	A	first	male	Age5	0	Day7	0						no
B0053	dronepara	white	1	A	first	male	Age6	0	Day8	0						no
B0053	dronepara	white	1	A	first	male	Age7	0	Day9	0						no
B0053	dronepara	white	1	A	first	male	Age8									no
B0053	dronepara	white	1	A	first	male	Age9									no
B0054	dronepara	white	1	A	first	male	Age1	1	Day3	1	no	no				no
B0054	dronepara	white	1	A	first	male	Age2	0	Day4	0				1		no
B0054	dronepara	white	1	A	first	male	Age3	0	Day5	0						no
B0054	dronepara	white	1	A	first	male	Age4	0	Day6	0						no
B0054	dronepara	white	1	A	first	male	Age5	0	Day7	0						no
B0054	dronepara	white	1	A	first	male	Age6									no
B0054	dronepara	white	1	A	first	male	Age7									no
B0054	dronepara	white	1	A	first	male	Age8									no
B0054	dronepara	white	1	A	first	male	Age9									no
B0055	dronepara	white	1	A	first	male	Age1	1	Day3	1						no
B0055	dronepara	white	1	A	first	male	Age2	0	Day4	0				1		no
B0055	dronepara	white	1	A	first	male	Age3	0	Day5	0						no
B0055	dronepara	white	1	A	first	male	Age4	1	Day6	1	yes	yes	1			no
B0055	dronepara	white	1	A	first	male	Age5	0	Day7	0				1		no
B0055	dronepara	white	1	A	first	male	Age6									no
B0055	dronepara	white	1	A	first	male	Age7									no
B0055	dronepara	white	1	A	first	male	Age8									no
B0055	dronepara	white	1	A	first	male	Age9									no
B0056	dronepara	green	1	A	first	male	Age1	1	Day4	1						no
B0056	dronepara	green	1	A	first	male	Age2	0	Day5	0				1		no
B0056	dronepara	green	1	A	first	male	Age3	1	Day6	1	yes	yes	1			no
B0056	dronepara	green	1	A	first	male	Age4	1	Day7	1						no
B0056	dronepara	green	1	A	first	male	Age5									no
B0056	dronepara	green	1	A	first	male	Age6									no
B0056	dronepara	green	1	A	first	male	Age7									no
B0056	dronepara	green	1	A	first	male	Age8									no
B0056	dronepara	green	1	A	first	male	Age9									no
B0057	dronepara	green	1	A	first	male	Age1	1	Day4	1	no	no				no
B0057	dronepara	green	1	A	first	male	Age2	0	Day5	0				1		no
B0057	dronepara	green	1	A	first	male	Age3	0	Day6	0						no
B0057	dronepara	green	1	A	first	male	Age4									no
B0057	dronepara	green	1	A	first	male	Age5	0	Day8	0						no
B0057	dronepara	green	1	A	first	male	Age6									no
B0057	dronepara	green	1	A	first	male	Age7									no
B0057	dronepara	green	1	A	first	male	Age8									no
B0057	dronepara	green	1	A	first	male	Age9									no
B0058	dronepara	green	1	A	first	male	Age1	1	Day4	1	no	no				no
B0058	dronepara	green	1	A	first	male	Age2	0	Day5	0				1		no
B0058	dronepara	green	1	A	first	male	Age3	0	Day6	0						no
B0058	dronepara	green	1	A	first	male	Age4	0	Day7	0						no
B0058	dronepara	green	1	A	first	male	Age5	0	Day8	0						no
B0058	dronepara	green	1	A	first	male	Age6	0	Day9	0						no
B0058	dronepara	green	1	A	first	male	Age7									no
B0058	dronepara	green	1	A	first	male	Age8									no
B0058	dronepara	green	1	A	first	male	Age9									no
B0059	dronepara	green	1	A	first	male	Age1	2	Day4	2
B0059	dronepara	green	1	A	first	male	Age2	0	Day5	0				2		no
B0059	dronepara	green	1	A	first	male	Age3	2	Day6	2	yes	yes	2			yes
B0059	dronepara	green	1	A	first	male	Age4	1	Day7	1				1		no
B0059	dronepara	green	1	A	first	male	Age5	0	Day8	0				1		no
B0059	dronepara	green	1	A	first	male	Age6	0	Day9	0						no
B0059	dronepara	green	1	A	first	male	Age7									no
B0059	dronepara	green	1	A	first	male	Age8									no
B0059	dronepara	green	1	A	first	male	Age9									no
B0060	dronepara	green	1	A	first	male	Age1	1	Day4	1	no	no				no
B0060	dronepara	green	1	A	first	male	Age2	1	Day5	1						no
B0060	dronepara	green	1	A	first	male	Age3	0	Day6	0				1		no
B0060	dronepara	green	1	A	first	male	Age4	0	Day7	0						no
B0060	dronepara	green	1	A	first	male	Age5	0	Day8	0						no
B0060	dronepara	green	1	A	first	male	Age6	0	Day9	0						no
B0060	dronepara	green	1	A	first	male	Age7									no
B0060	dronepara	green	1	A	first	male	Age8									no
B0060	dronepara	green	1	A	first	male	Age9									no
B0061	dronepara	green	1	A	first	male	Age1	3	Day4	3	no	no				yes
B0061	dronepara	green	1	A	first	male	Age2	2	Day5	2				1
B0061	dronepara	green	1	A	first	male	Age3	1	Day6	1				1		no
B0061	dronepara	green	1	A	first	male	Age4	0	Day7	0				1		no
B0061	dronepara	green	1	A	first	male	Age5									no
B0061	dronepara	green	1	A	first	male	Age6									no
B0061	dronepara	green	1	A	first	male	Age7									no
B0061	dronepara	green	1	A	first	male	Age8									no
B0061	dronepara	green	1	A	first	male	Age9									no
B0062	dronepara	green	1	A	first	male	Age1	1	Day4	1						no
B0062	dronepara	green	1	A	first	male	Age2	1	Day5	1						no
B0062	dronepara	green	1	A	first	male	Age3	0	Day6	0				1		no
B0062	dronepara	green	1	A	first	male	Age4	0	Day7	0						no
B0062	dronepara	green	1	A	first	male	Age5	0	Day8	0						no
B0062	dronepara	green	1	A	first	male	Age6	1	Day9	1	yes	no	1			no
B0062	dronepara	green	1	A	first	male	Age7									no
B0062	dronepara	green	1	A	first	male	Age8									no
B0062	dronepara	green	1	A	first	male	Age9									no
B0063	dronepara	green	1	A	first	male	Age1	1	Day4	1	no	no				no
B0063	dronepara	green	1	A	first	male	Age2	0	Day5	0				1		no
B0063	dronepara	green	1	A	first	male	Age3	0	Day6	0						no
B0063	dronepara	green	1	A	first	male	Age4									no
B0063	dronepara	green	1	A	first	male	Age5									no
B0063	dronepara	green	1	A	first	male	Age6									no
B0063	dronepara	green	1	A	first	male	Age7									no
B0063	dronepara	green	1	A	first	male	Age8									no
B0063	dronepara	green	1	A	first	male	Age9									no
B0064	dronepara	pink	1	A	first	male	Age1	1	Day5	1	no	no				no
B0064	dronepara	pink	1	A	first	male	Age2									no
B0064	dronepara	pink	1	A	first	male	Age3									no
B0064	dronepara	pink	1	A	first	male	Age4									no
B0064	dronepara	pink	1	A	first	male	Age5									no
B0064	dronepara	pink	1	A	first	male	Age6									no
B0064	dronepara	pink	1	A	first	male	Age7									no
B0064	dronepara	pink	1	A	first	male	Age8									no
B0064	dronepara	pink	1	A	first	male	Age9									no
B0065	dronepara	pink	1	A	first	male	Age1	1	Day5	1	no	no				no
B0065	dronepara	pink	1	A	first	male	Age2	0	Day6	0				1		no
B0065	dronepara	pink	1	A	first	male	Age3	0	Day7	0						no
B0065	dronepara	pink	1	A	first	male	Age4	0	Day8	0						no
B0065	dronepara	pink	1	A	first	male	Age5									no
B0065	dronepara	pink	1	A	first	male	Age6									no
B0065	dronepara	pink	1	A	first	male	Age7									no
B0065	dronepara	pink	1	A	first	male	Age8									no
B0065	dronepara	pink	1	A	first	male	Age9									no
B0066	dronepara	pink	1	A	first	male	Age1	2	Day5	2						yes
B0066	dronepara	pink	1	A	first	male	Age2	1	Day6	1				1		no
B0066	dronepara	pink	1	A	first	male	Age3	1	Day7	1						no
B0066	dronepara	pink	1	A	first	male	Age4	0	Day8	0				1		no
B0066	dronepara	pink	1	A	first	male	Age5	1	Day9	1	yes	yes	1			no
B0066	dronepara	pink	1	A	first	male	Age6									no
B0066	dronepara	pink	1	A	first	male	Age7									no
B0066	dronepara	pink	1	A	first	male	Age8									no
B0066	dronepara	pink	1	A	first	male	Age9									no
B0067	dronepara	pink	1	A	first	male	Age1	1	Day5	1						no
B0067	dronepara	pink	1	A	first	male	Age2	0	Day6	0				1		no
B0067	dronepara	pink	1	A	first	male	Age3									no
B0067	dronepara	pink	1	A	first	male	Age4	1	Day8	1	yes	no				no
B0067	dronepara	pink	1	A	first	male	Age5	0	Day9	0			1			no
B0067	dronepara	pink	1	A	first	male	Age6									no
B0067	dronepara	pink	1	A	first	male	Age7									no
B0067	dronepara	pink	1	A	first	male	Age8									no
B0067	dronepara	pink	1	A	first	male	Age9									no
B0068	dronepara	pink	1	A	first	male	Age1	1	Day5	1	no	no				no
B0068	dronepara	pink	1	A	first	male	Age2	0	Day6	0				1		no
B0068	dronepara	pink	1	A	first	male	Age3	0	Day7	0						no
B0068	dronepara	pink	1	A	first	male	Age4									no
B0068	dronepara	pink	1	A	first	male	Age5									no
B0068	dronepara	pink	1	A	first	male	Age6									no
B0068	dronepara	pink	1	A	first	male	Age7									no
B0068	dronepara	pink	1	A	first	male	Age8									no
B0068	dronepara	pink	1	A	first	male	Age9									no
B0069	dronepara	pink	1	A	first	male	Age1	1	Day5	1	no	no				no
B0069	dronepara	pink	1	A	first	male	Age2	1	Day6	1						no
B0069	dronepara	pink	1	A	first	male	Age3	1	Day7	1						no
B0069	dronepara	pink	1	A	first	male	Age4									no
B0069	dronepara	pink	1	A	first	male	Age5									no
B0069	dronepara	pink	1	A	first	male	Age6									no
B0069	dronepara	pink	1	A	first	male	Age7									no
B0069	dronepara	pink	1	A	first	male	Age8									no
B0069	dronepara	pink	1	A	first	male	Age9									no
B0070	dronepara	pink	1	A	first	male	Age1	4	Day5	4	no	no				yes
B0070	dronepara	pink	1	A	first	male	Age2	2	Day6	2				2
B0070	dronepara	pink	1	A	first	male	Age3	1	Day7	1				1		no
B0070	dronepara	pink	1	A	first	male	Age4	0	Day8	0				1		no
B0070	dronepara	pink	1	A	first	male	Age5	0	Day9	0						no
B0070	dronepara	pink	1	A	first	male	Age6									no
B0070	dronepara	pink	1	A	first	male	Age7									no
B0070	dronepara	pink	1	A	first	male	Age8									no
B0070	dronepara	pink	1	A	first	male	Age9									no
B0071	dronepara	pink	1	A	first	male	Age1	1	Day5	1	no	no				no
B0071	dronepara	pink	1	A	first	male	Age2	2	Day6	2			1			yes
B0071	dronepara	pink	1	A	first	male	Age3	0	Day7	0				2		no
B0071	dronepara	pink	1	A	first	male	Age4									no
B0071	dronepara	pink	1	A	first	male	Age5									no
B0071	dronepara	pink	1	A	first	male	Age6									no
B0071	dronepara	pink	1	A	first	male	Age7									no
B0071	dronepara	pink	1	A	first	male	Age8									no
B0071	dronepara	pink	1	A	first	male	Age9									no
B0072	dronepara	pink	1	A	first	male	Age1	3	Day5	3						yes
B0072	dronepara	pink	1	A	first	male	Age2	0	Day6	0				3		no
B0072	dronepara	pink	1	A	first	male	Age3	1	Day7	1	yes	yes	1			no
B0072	dronepara	pink	1	A	first	male	Age4									no
B0072	dronepara	pink	1	A	first	male	Age5	0	Day9	0				1		no
B0072	dronepara	pink	1	A	first	male	Age6									no
B0072	dronepara	pink	1	A	first	male	Age7									no
B0072	dronepara	pink	1	A	first	male	Age8									no
B0072	dronepara	pink	1	A	first	male	Age9									no
B0073	dronepara	pink	1	A	first	male	Age1	1	Day5	1	no	no				no
B0073	dronepara	pink	1	A	first	male	Age2	0	Day6	0				1		no
B0073	dronepara	pink	1	A	first	male	Age3	0	Day7	0						no
B0073	dronepara	pink	1	A	first	male	Age4									no
B0073	dronepara	pink	1	A	first	male	Age5									no
B0073	dronepara	pink	1	A	first	male	Age6									no
B0073	dronepara	pink	1	A	first	male	Age7									no
B0073	dronepara	pink	1	A	first	male	Age8									no
B0073	dronepara	pink	1	A	first	male	Age9									no
B0074	stripespara	blue	1	A	first	male	Age1									no
B0074	stripespara	blue	1	A	first	male	Age2	1	Day2	1	no	no	1			no
B0074	stripespara	blue	1	A	first	male	Age3	1	Day3	1						no
B0074	stripespara	blue	1	A	first	male	Age4	0	Day4	0				1		no
B0074	stripespara	blue	1	A	first	male	Age5	0	Day5	0						no
B0074	stripespara	blue	1	A	first	male	Age6	0	Day6	0						no
B0074	stripespara	blue	1	A	first	male	Age7	0	Day7	0						no
B0074	stripespara	blue	1	A	first	male	Age8									no
B0074	stripespara	blue	1	A	first	male	Age9									no
B0075	stripespara	blue	1	A	first	male	Age1									no
B0075	stripespara	blue	1	A	first	male	Age2	1	Day2	1	no	no	1			no
B0075	stripespara	blue	1	A	first	male	Age3	0	Day3	0				1		no
B0075	stripespara	blue	1	A	first	male	Age4	0	Day4	0						no
B0075	stripespara	blue	1	A	first	male	Age5	0	Day5	0						no
B0075	stripespara	blue	1	A	first	male	Age6	0	Day6	0						no
B0075	stripespara	blue	1	A	first	male	Age7	0	Day7	0						no
B0075	stripespara	blue	1	A	first	male	Age8									no
B0075	stripespara	blue	1	A	first	male	Age9									no
B0076	stripespara	blue	1	A	first	male	Age1									no
B0076	stripespara	blue	1	A	first	male	Age2	1	Day2	1	no	no	1			no
B0076	stripespara	blue	1	A	first	male	Age3	2	Day3	2			1		1	yes
B0076	stripespara	blue	1	A	first	male	Age4	0	Day4	0				2		no
B0076	stripespara	blue	1	A	first	male	Age5	0	Day5	0						no
B0076	stripespara	blue	1	A	first	male	Age6	0	Day6	0						no
B0076	stripespara	blue	1	A	first	male	Age7	0	Day7	0						no
B0076	stripespara	blue	1	A	first	male	Age8									no
B0076	stripespara	blue	1	A	first	male	Age9									no
B0077	stripespara	blue	1	A	first	male	Age1									no
B0077	stripespara	blue	1	A	first	male	Age2	1	Day2	1	no	no	1			no
B0077	stripespara	blue	1	A	first	male	Age3	0	Day3	0				1		no
B0077	stripespara	blue	1	A	first	male	Age4	0	Day4	0						no
B0077	stripespara	blue	1	A	first	male	Age5	0	Day5	0						no
B0077	stripespara	blue	1	A	first	male	Age6	0	Day6	0						no
B0077	stripespara	blue	1	A	first	male	Age7	0	Day7	0						no
B0077	stripespara	blue	1	A	first	male	Age8	0	Day8	0						no
B0077	stripespara	blue	1	A	first	male	Age9	0	Day9	0						no
B0078	stripespara	blue	1	A	first	male	Age1									no
B0078	stripespara	blue	1	A	first	male	Age2	1	Day2	1	no	no	1			no
B0078	stripespara	blue	1	A	first	male	Age3	0	Day3	0				1		no
B0078	stripespara	blue	1	A	first	male	Age4	0	Day4	0						no
B0078	stripespara	blue	1	A	first	male	Age5									no
B0078	stripespara	blue	1	A	first	male	Age6									no
B0078	stripespara	blue	1	A	first	male	Age7									no
B0078	stripespara	blue	1	A	first	male	Age8									no
B0078	stripespara	blue	1	A	first	male	Age9									no
B0079	stripespara	blue	1	A	first	male	Age1									no
B0079	stripespara	blue	1	A	first	male	Age2	1	Day2	1			1			no
B0079	stripespara	blue	1	A	first	male	Age3	0	Day3	0				1		no
B0079	stripespara	blue	1	A	first	male	Age4	0	Day4	0						no
B0079	stripespara	blue	1	A	first	male	Age5									no
B0079	stripespara	blue	1	A	first	male	Age6	0	Day6	0						no
B0079	stripespara	blue	1	A	first	male	Age7	1	Day7	1	yes	no	1			no
B0079	stripespara	blue	1	A	first	male	Age8	0	Day8	0				1		no
B0079	stripespara	blue	1	A	first	male	Age9	0	Day9	0						no
B0080	stripespara	blue	1	A	first	male	Age1									no
B0080	stripespara	blue	1	A	first	male	Age2	2	Day2	2	no	no	2			yes
B0080	stripespara	blue	1	A	first	male	Age3	0	Day3	0				2		no
B0080	stripespara	blue	1	A	first	male	Age4	0	Day4	0						no
B0080	stripespara	blue	1	A	first	male	Age5									no
B0080	stripespara	blue	1	A	first	male	Age6									no
B0080	stripespara	blue	1	A	first	male	Age7									no
B0080	stripespara	blue	1	A	first	male	Age8									no
B0080	stripespara	blue	1	A	first	male	Age9									no
B0081	stripespara	blue	1	A	first	male	Age1									no
B0081	stripespara	blue	1	A	first	male	Age2	1	Day2	1			1			no
B0081	stripespara	blue	1	A	first	male	Age3	1	Day3	1						no
B0081	stripespara	blue	1	A	first	male	Age4	0	Day4	0				1		no
B0081	stripespara	blue	1	A	first	male	Age5	0	Day5	0						no
B0081	stripespara	blue	1	A	first	male	Age6	0	Day6	0						no
B0081	stripespara	blue	1	A	first	male	Age7	0	Day7	0						no
B0081	stripespara	blue	1	A	first	male	Age8	0	Day8	0						no
B0081	stripespara	blue	1	A	first	male	Age9	1	Day9	1	yes	no	1		1	no
B0082	stripespara	blue	1	A	first	male	Age1									no
B0082	stripespara	blue	1	A	first	male	Age2	1	Day2	1			1			no
B0082	stripespara	blue	1	A	first	male	Age3	1	Day3	1						no
B0082	stripespara	blue	1	A	first	male	Age4	0	Day4	0				1		no
B0082	stripespara	blue	1	A	first	male	Age5	0	Day5	0						no
B0082	stripespara	blue	1	A	first	male	Age6	0	Day6	0						no
B0082	stripespara	blue	1	A	first	male	Age7	1	Day7	1	yes	no	1		1	no
B0082	stripespara	blue	1	A	first	male	Age8	0	Day8	0				1		no
B0082	stripespara	blue	1	A	first	male	Age9	0	Day9	0						no
B0083	stripespara	blue	1	A	first	male	Age1									no
B0083	stripespara	blue	1	A	first	male	Age2	1	Day2	1	no	no	1			no
B0083	stripespara	blue	1	A	first	male	Age3	0	Day3	0				1		no
B0083	stripespara	blue	1	A	first	male	Age4									no
B0083	stripespara	blue	1	A	first	male	Age5									no
B0083	stripespara	blue	1	A	first	male	Age6									no
B0083	stripespara	blue	1	A	first	male	Age7									no
B0083	stripespara	blue	1	A	first	male	Age8									no
B0083	stripespara	blue	1	A	first	male	Age9									no
B0084	stripespara	blue	1	A	first	male	Age1									no
B0084	stripespara	blue	1	A	first	male	Age2	1	Day2	1			1			no
B0084	stripespara	blue	1	A	first	male	Age3	0	Day3	0				1		no
B0084	stripespara	blue	1	A	first	male	Age4	1	Day4	1	yes	no	1		1	no
B0084	stripespara	blue	1	A	first	male	Age5	0	Day5	0				1		no
B0084	stripespara	blue	1	A	first	male	Age6	1	Day6	1			1		1	no
B0084	stripespara	blue	1	A	first	male	Age7	0	Day7	0				1		no
B0084	stripespara	blue	1	A	first	male	Age8	0	Day8	0						no
B0084	stripespara	blue	1	A	first	male	Age9	0	Day9	0						no
B0085	stripespara	blue	1	A	first	male	Age1									no
B0085	stripespara	blue	1	A	first	male	Age2	2	Day2	2			2			yes
B0085	stripespara	blue	1	A	first	male	Age3	0	Day3	0				2		no
B0085	stripespara	blue	1	A	first	male	Age4	0	Day4	0						no
B0085	stripespara	blue	1	A	first	male	Age5	0	Day5	0						no
B0085	stripespara	blue	1	A	first	male	Age6	1	Day6	1	yes	no	1		1	no
B0085	stripespara	blue	1	A	first	male	Age7	0	Day7	0				1		no
B0085	stripespara	blue	1	A	first	male	Age8	1	Day8	1			1		1	no
B0085	stripespara	blue	1	A	first	male	Age9	0	Day9	0				1		no
B0086	stripespara	blue	1	A	first	male	Age1									no
B0086	stripespara	blue	1	A	first	male	Age2	1	Day2	1			1			no
B0086	stripespara	blue	1	A	first	male	Age3	3	Day3	3	yes	yes	2			yes
B0086	stripespara	blue	1	A	first	male	Age4	0	Day4	0				3		no
B0086	stripespara	blue	1	A	first	male	Age5	0	Day5	0						no
B0086	stripespara	blue	1	A	first	male	Age6	0	Day6	0						no
B0086	stripespara	blue	1	A	first	male	Age7	0	Day7	0						no
B0086	stripespara	blue	1	A	first	male	Age8									no
B0086	stripespara	blue	1	A	first	male	Age9									no
B0087	stripespara	blue	1	A	first	male	Age1									no
B0087	stripespara	blue	1	A	first	male	Age2									no
B0087	stripespara	blue	1	A	first	male	Age3	1	Day3	1	no	no	1			no
B0087	stripespara	blue	1	A	first	male	Age4	0	Day4	0				1		no
B0087	stripespara	blue	1	A	first	male	Age5	0	Day5	0						no
B0087	stripespara	blue	1	A	first	male	Age6	0	Day6	0						no
B0087	stripespara	blue	1	A	first	male	Age7	0	Day7	0						no
B0087	stripespara	blue	1	A	first	male	Age8	0	Day8	0						no
B0087	stripespara	blue	1	A	first	male	Age9	0	Day9	0						no
B0088	stripespara	blue	1	A	first	male	Age1									no
B0088	stripespara	blue	1	A	first	male	Age2									no
B0088	stripespara	blue	1	A	first	male	Age3	2	Day3	2			2			yes
B0088	stripespara	blue	1	A	first	male	Age4	0	Day4	0				2		no
B0088	stripespara	blue	1	A	first	male	Age5	0	Day5	0						no
B0088	stripespara	blue	1	A	first	male	Age6	0	Day6	0						no
B0088	stripespara	blue	1	A	first	male	Age7	1	Day7	1	yes	yes	1		1	no
B0088	stripespara	blue	1	A	first	male	Age8	0	Day8	0				1		no
B0088	stripespara	blue	1	A	first	male	Age9	0	Day9	0						no
B0089	stripespara	blue	1	A	first	male	Age1									no
B0089	stripespara	blue	1	A	first	male	Age2									no
B0089	stripespara	blue	1	A	first	male	Age3	1	Day3	1			1			no
B0089	stripespara	blue	1	A	first	male	Age4	2	Day4	2	yes	yes	1		1	yes
B0089	stripespara	blue	1	A	first	male	Age5	0	Day5	0				2		no
B0089	stripespara	blue	1	A	first	male	Age6									no
B0089	stripespara	blue	1	A	first	male	Age7	0	Day7	0						no
B0089	stripespara	blue	1	A	first	male	Age8	0	Day8	0						no
B0089	stripespara	blue	1	A	first	male	Age9	0	Day9	0						no
B0090	stripespara	blue	1	A	first	male	Age1									no
B0090	stripespara	blue	1	A	first	male	Age2									no
B0090	stripespara	blue	1	A	first	male	Age3	1	Day3	1			1			no
B0090	stripespara	blue	1	A	first	male	Age4	0	Day4	0				1		no
B0090	stripespara	blue	1	A	first	male	Age5	0	Day5	0						no
B0090	stripespara	blue	1	A	first	male	Age6	1	Day6	1	yes	no	1		1	no
B0090	stripespara	blue	1	A	first	male	Age7	0	Day7	0				1		no
B0090	stripespara	blue	1	A	first	male	Age8	0	Day8	0						no
B0090	stripespara	blue	1	A	first	male	Age9	0	Day9	0						no
B0091	stripespara	blue	1	A	first	male	Age1									no
B0091	stripespara	blue	1	A	first	male	Age2									no
B0091	stripespara	blue	1	A	first	male	Age3									no
B0091	stripespara	blue	1	A	first	male	Age4	1	Day4	1	no	no	1			no
B0091	stripespara	blue	1	A	first	male	Age5	0	Day5	0				1		no
B0091	stripespara	blue	1	A	first	male	Age6									no
B0091	stripespara	blue	1	A	first	male	Age7									no
B0091	stripespara	blue	1	A	first	male	Age8									no
B0091	stripespara	blue	1	A	first	male	Age9									no
B0092	stripespara	blue	1	A	first	male	Age1									no
B0092	stripespara	blue	1	A	first	male	Age2									no
B0092	stripespara	blue	1	A	first	male	Age3									no
B0092	stripespara	blue	1	A	first	male	Age4									no
B0092	stripespara	blue	1	A	first	male	Age5	1	Day5	1	no	no	1			no
B0092	stripespara	blue	1	A	first	male	Age6	0	Day6	0				1		no
B0092	stripespara	blue	1	A	first	male	Age7									no
B0092	stripespara	blue	1	A	first	male	Age8									no
B0092	stripespara	blue	1	A	first	male	Age9									no
B0093	stripespara	yellow	1	A	first	male	Age1									no
B0093	stripespara	yellow	1	A	first	male	Age2	1	Day3	1	no	no	1			no
B0093	stripespara	yellow	1	A	first	male	Age3	0	Day4	0				1		no
B0093	stripespara	yellow	1	A	first	male	Age4	0	Day5	0						no
B0093	stripespara	yellow	1	A	first	male	Age5	0	Day6	0						no
B0093	stripespara	yellow	1	A	first	male	Age6	0	Day7	0						no
B0093	stripespara	yellow	1	A	first	male	Age7	0	Day8	0						no
B0093	stripespara	yellow	1	A	first	male	Age8	0	Day9	0						no
B0093	stripespara	yellow	1	A	first	male	Age9									no
B0094	stripespara	yellow	1	A	first	male	Age1									no
B0094	stripespara	yellow	1	A	first	male	Age2	1	Day3	1	no	no	1			no
B0094	stripespara	yellow	1	A	first	male	Age3	0	Day4	0				1		no
B0094	stripespara	yellow	1	A	first	male	Age4	0	Day5	0						no
B0094	stripespara	yellow	1	A	first	male	Age5	0	Day6	0						no
B0094	stripespara	yellow	1	A	first	male	Age6	0	Day7	0						no
B0094	stripespara	yellow	1	A	first	male	Age7	0	Day8	0						no
B0094	stripespara	yellow	1	A	first	male	Age8	0	Day9	0						no
B0094	stripespara	yellow	1	A	first	male	Age9									no
B0095	stripespara	yellow	1	A	first	male	Age1									no
B0095	stripespara	yellow	1	A	first	male	Age2	1	Day3	1	no	no	1			no
B0095	stripespara	yellow	1	A	first	male	Age3	0	Day4	0				1		no
B0095	stripespara	yellow	1	A	first	male	Age4	0	Day5	0						no
B0095	stripespara	yellow	1	A	first	male	Age5	0	Day6	0						no
B0095	stripespara	yellow	1	A	first	male	Age6	0	Day7	0						no
B0095	stripespara	yellow	1	A	first	male	Age7	0	Day8	0						no
B0095	stripespara	yellow	1	A	first	male	Age8	0	Day9	0						no
B0095	stripespara	yellow	1	A	first	male	Age9									no
B0096	stripespara	yellow	1	A	first	male	Age1									no
B0096	stripespara	yellow	1	A	first	male	Age2	1	Day3	1			1			no
B0096	stripespara	yellow	1	A	first	male	Age3	0	Day4	0				1		no
B0096	stripespara	yellow	1	A	first	male	Age4	1	Day5	1	yes	no	1		1	no
B0096	stripespara	yellow	1	A	first	male	Age5	0	Day6	0				1		no
B0096	stripespara	yellow	1	A	first	male	Age6	0	Day7	0						no
B0096	stripespara	yellow	1	A	first	male	Age7									no
B0096	stripespara	yellow	1	A	first	male	Age8									no
B0096	stripespara	yellow	1	A	first	male	Age9									no
B0097	stripespara	yellow	1	A	first	male	Age1									no
B0097	stripespara	yellow	1	A	first	male	Age2	1	Day3	1	no	no	1			no
B0097	stripespara	yellow	1	A	first	male	Age3	0	Day4	0				1		no
B0097	stripespara	yellow	1	A	first	male	Age4	0	Day5	0						no
B0097	stripespara	yellow	1	A	first	male	Age5	0	Day6	0						no
B0097	stripespara	yellow	1	A	first	male	Age6	0	Day7	0						no
B0097	stripespara	yellow	1	A	first	male	Age7	0	Day8	0						no
B0097	stripespara	yellow	1	A	first	male	Age8	0	Day9	0						no
B0097	stripespara	yellow	1	A	first	male	Age9									no
B0098	stripespara	yellow	1	A	first	male	Age1									no
B0098	stripespara	yellow	1	A	first	male	Age2	2	Day3	2			2
B0098	stripespara	yellow	1	A	first	male	Age3	0	Day4	0				2		no
B0098	stripespara	yellow	1	A	first	male	Age4	0	Day5	0						no
B0098	stripespara	yellow	1	A	first	male	Age5	2	Day6	2	yes	yes	2		2	yes
B0098	stripespara	yellow	1	A	first	male	Age6	0	Day7	0				2		no
B0098	stripespara	yellow	1	A	first	male	Age7	0	Day8	0						no
B0098	stripespara	yellow	1	A	first	male	Age8	1	Day9	1			1		1	no
B0098	stripespara	yellow	1	A	first	male	Age9									no
B0099	stripespara	yellow	1	A	first	male	Age1									no
B0099	stripespara	yellow	1	A	first	male	Age2	1	Day3	1	no	no	1			no
B0099	stripespara	yellow	1	A	first	male	Age3	0	Day4	0				1		no
B0099	stripespara	yellow	1	A	first	male	Age4	0	Day5	0						no
B0099	stripespara	yellow	1	A	first	male	Age5	0	Day6	0						no
B0099	stripespara	yellow	1	A	first	male	Age6	0	Day7	0						no
B0099	stripespara	yellow	1	A	first	male	Age7	0	Day8	0						no
B0099	stripespara	yellow	1	A	first	male	Age8	0	Day9	0						no
B0099	stripespara	yellow	1	A	first	male	Age9									no
B0100	stripespara	yellow	1	A	first	male	Age1									no
B0100	stripespara	yellow	1	A	first	male	Age2	1	Day3	1			1			no
B0100	stripespara	yellow	1	A	first	male	Age3	0	Day4	0				1		no
B0100	stripespara	yellow	1	A	first	male	Age4	1	Day5	1	yes	no	1		1	no
B0100	stripespara	yellow	1	A	first	male	Age5	1	Day6	1						no
B0100	stripespara	yellow	1	A	first	male	Age6	0	Day7	0				1		no
B0100	stripespara	yellow	1	A	first	male	Age7	0	Day8	0						no
B0100	stripespara	yellow	1	A	first	male	Age8	1	Day9	1			1		1	no
B0100	stripespara	yellow	1	A	first	male	Age9									no
B0101	stripespara	yellow	1	A	first	male	Age1									no
B0101	stripespara	yellow	1	A	first	male	Age2	1	Day3	1			1			no
B0101	stripespara	yellow	1	A	first	male	Age3	0	Day4	0				1		no
B0101	stripespara	yellow	1	A	first	male	Age4	1	Day5	1			1		1	no
B0101	stripespara	yellow	1	A	first	male	Age5	1	Day6	1	yes	no				no
B0101	stripespara	yellow	1	A	first	male	Age6	1	Day7	1						no
B0101	stripespara	yellow	1	A	first	male	Age7	1	Day8	1						no
B0101	stripespara	yellow	1	A	first	male	Age8	0	Day9	0				1		no
B0101	stripespara	yellow	1	A	first	male	Age9									no
B0102	stripespara	yellow	1	A	first	male	Age1									no
B0102	stripespara	yellow	1	A	first	male	Age2	1	Day3	1			1			no
B0102	stripespara	yellow	1	A	first	male	Age3	1	Day4	1						no
B0102	stripespara	yellow	1	A	first	male	Age4	0	Day5	0				1		no
B0102	stripespara	yellow	1	A	first	male	Age5	0	Day6	0						no
B0102	stripespara	yellow	1	A	first	male	Age6	0	Day7	0						no
B0102	stripespara	yellow	1	A	first	male	Age7	1	Day8	1	yes	no	1		1	no
B0102	stripespara	yellow	1	A	first	male	Age8	0	Day9	0				1		no
B0102	stripespara	yellow	1	A	first	male	Age9									no
B0103	stripespara	yellow	1	A	first	male	Age1									no
B0103	stripespara	yellow	1	A	first	male	Age2	2	Day3	2	no	no	2			yes
B0103	stripespara	yellow	1	A	first	male	Age3									no
B0103	stripespara	yellow	1	A	first	male	Age4									no
B0103	stripespara	yellow	1	A	first	male	Age5									no
B0103	stripespara	yellow	1	A	first	male	Age6									no
B0103	stripespara	yellow	1	A	first	male	Age7									no
B0103	stripespara	yellow	1	A	first	male	Age8									no
B0103	stripespara	yellow	1	A	first	male	Age9									no
B0104	stripespara	yellow	1	A	first	male	Age1									no
B0104	stripespara	yellow	1	A	first	male	Age2	1	Day3	1			1			no
B0104	stripespara	yellow	1	A	first	male	Age3	0	Day4	0				1		no
B0104	stripespara	yellow	1	A	first	male	Age4	1	Day5	1	yes	no	1		1	no
B0104	stripespara	yellow	1	A	first	male	Age5	1	Day6	1						no
B0104	stripespara	yellow	1	A	first	male	Age6	1	Day7	1						no
B0104	stripespara	yellow	1	A	first	male	Age7	0	Day8	0				1		no
B0104	stripespara	yellow	1	A	first	male	Age8	0	Day9	0						no
B0104	stripespara	yellow	1	A	first	male	Age9									no
B0105	stripespara	yellow	1	A	first	male	Age1									no
B0105	stripespara	yellow	1	A	first	male	Age2	1	Day3	1	no	no	1			no
B0105	stripespara	yellow	1	A	first	male	Age3	0	Day4	0				1		no
B0105	stripespara	yellow	1	A	first	male	Age4	0	Day5	0						no
B0105	stripespara	yellow	1	A	first	male	Age5	0	Day6	0						no
B0105	stripespara	yellow	1	A	first	male	Age6	0	Day7	0						no
B0105	stripespara	yellow	1	A	first	male	Age7	0	Day8	0						no
B0105	stripespara	yellow	1	A	first	male	Age8	0	Day9	0						no
B0105	stripespara	yellow	1	A	first	male	Age9									no
B0106	stripespara	yellow	1	A	first	male	Age1									no
B0106	stripespara	yellow	1	A	first	male	Age2	1	Day3	1			1			no
B0106	stripespara	yellow	1	A	first	male	Age3	0	Day4	0				1		no
B0106	stripespara	yellow	1	A	first	male	Age4	1	Day5	1	yes	no	1		1	no
B0106	stripespara	yellow	1	A	first	male	Age5	1	Day6	1						no
B0106	stripespara	yellow	1	A	first	male	Age6	1	Day7	1						no
B0106	stripespara	yellow	1	A	first	male	Age7	0	Day8	0				1		no
B0106	stripespara	yellow	1	A	first	male	Age8	0	Day9	0						no
B0106	stripespara	yellow	1	A	first	male	Age9									no
B0107	stripespara	yellow	1	A	first	male	Age1									no
B0107	stripespara	yellow	1	A	first	male	Age2	1	Day3	1	no	no	1			no
B0107	stripespara	yellow	1	A	first	male	Age3	0	Day4	0				1		no
B0107	stripespara	yellow	1	A	first	male	Age4	0	Day5	0						no
B0107	stripespara	yellow	1	A	first	male	Age5									no
B0107	stripespara	yellow	1	A	first	male	Age6									no
B0107	stripespara	yellow	1	A	first	male	Age7									no
B0107	stripespara	yellow	1	A	first	male	Age8									no
B0107	stripespara	yellow	1	A	first	male	Age9									no
B0108	stripespara	yellow	1	A	first	male	Age1									no
B0108	stripespara	yellow	1	A	first	male	Age2	1	Day3	1			1			no
B0108	stripespara	yellow	1	A	first	male	Age3	0	Day4	0				1		no
B0108	stripespara	yellow	1	A	first	male	Age4	1	Day5	1	yes	no	1		1	no
B0108	stripespara	yellow	1	A	first	male	Age5									no
B0108	stripespara	yellow	1	A	first	male	Age6									no
B0108	stripespara	yellow	1	A	first	male	Age7									no
B0108	stripespara	yellow	1	A	first	male	Age8									no
B0108	stripespara	yellow	1	A	first	male	Age9									no
B0109	stripespara	yellow	1	A	first	male	Age1									no
B0109	stripespara	yellow	1	A	first	male	Age2	2	Day3	2			2
B0109	stripespara	yellow	1	A	first	male	Age3	2	Day4	2
B0109	stripespara	yellow	1	A	first	male	Age4	1	Day5	1				1		no
B0109	stripespara	yellow	1	A	first	male	Age5	2	Day6	2	yes	yes	1		1	yes
B0109	stripespara	yellow	1	A	first	male	Age6	1	Day7	1				1		no
B0109	stripespara	yellow	1	A	first	male	Age7	0	Day8	0				1		no
B0109	stripespara	yellow	1	A	first	male	Age8	1	Day9	1			1		1	no
B0109	stripespara	yellow	1	A	first	male	Age9									no
B0110	stripespara	yellow	1	A	first	male	Age1									no
B0110	stripespara	yellow	1	A	first	male	Age2	1	Day3	1	no	no	1			no
B0110	stripespara	yellow	1	A	first	male	Age3									no
B0110	stripespara	yellow	1	A	first	male	Age4									no
B0110	stripespara	yellow	1	A	first	male	Age5									no
B0110	stripespara	yellow	1	A	first	male	Age6									no
B0110	stripespara	yellow	1	A	first	male	Age7									no
B0110	stripespara	yellow	1	A	first	male	Age8									no
B0110	stripespara	yellow	1	A	first	male	Age9									no
B0111	stripespara	yellow	1	A	first	male	Age1									no
B0111	stripespara	yellow	1	A	first	male	Age2	1	Day3	1	no	no	1			no
B0111	stripespara	yellow	1	A	first	male	Age3	0	Day4	0				1		no
B0111	stripespara	yellow	1	A	first	male	Age4	0	Day5	0						no
B0111	stripespara	yellow	1	A	first	male	Age5	0	Day6	0						no
B0111	stripespara	yellow	1	A	first	male	Age6									no
B0111	stripespara	yellow	1	A	first	male	Age7	0	Day8	0						no
B0111	stripespara	yellow	1	A	first	male	Age8	0	Day9	0						no
B0111	stripespara	yellow	1	A	first	male	Age9									no
B0112	stripespara	yellow	1	A	first	male	Age1									no
B0112	stripespara	yellow	1	A	first	male	Age2	1	Day3	1	no	no	1			no
B0112	stripespara	yellow	1	A	first	male	Age3									no
B0112	stripespara	yellow	1	A	first	male	Age4									no
B0112	stripespara	yellow	1	A	first	male	Age5									no
B0112	stripespara	yellow	1	A	first	male	Age6									no
B0112	stripespara	yellow	1	A	first	male	Age7									no
B0112	stripespara	yellow	1	A	first	male	Age8	0	Day9	0						no
B0112	stripespara	yellow	1	A	first	male	Age9									no
B0113	stripespara	yellow	1	A	first	male	Age1									no
B0113	stripespara	yellow	1	A	first	male	Age2	1	Day3	1			1			no
B0113	stripespara	yellow	1	A	first	male	Age3	2	Day4	2	yes	yes	1		1	yes
B0113	stripespara	yellow	1	A	first	male	Age4	0	Day5	0				2		no
B0113	stripespara	yellow	1	A	first	male	Age5	0	Day6	0						no
B0113	stripespara	yellow	1	A	first	male	Age6	0	Day7	0						no
B0113	stripespara	yellow	1	A	first	male	Age7	0	Day8	0						no
B0113	stripespara	yellow	1	A	first	male	Age8	0	Day9	0						no
B0113	stripespara	yellow	1	A	first	male	Age9									no
B0114	stripespara	yellow	1	A	first	male	Age1									no
B0114	stripespara	yellow	1	A	first	male	Age2	1	Day3	1			1			no
B0114	stripespara	yellow	1	A	first	male	Age3	3	Day4	3	yes	yes	2		2	yes
B0114	stripespara	yellow	1	A	first	male	Age4	1	Day5	1				2		no
B0114	stripespara	yellow	1	A	first	male	Age5	0	Day6	0				1		no
B0114	stripespara	yellow	1	A	first	male	Age6	0	Day7	0						no
B0114	stripespara	yellow	1	A	first	male	Age7	0	Day8	0						no
B0114	stripespara	yellow	1	A	first	male	Age8	0	Day9	0						no
B0114	stripespara	yellow	1	A	first	male	Age9									no
B0115	stripespara	yellow	1	A	first	male	Age1									no
B0115	stripespara	yellow	1	A	first	male	Age2									no
B0115	stripespara	yellow	1	A	first	male	Age3	1	Day4	1	no	no	1			no
B0115	stripespara	yellow	1	A	first	male	Age4	0	Day5	0				1		no
B0115	stripespara	yellow	1	A	first	male	Age5									no
B0115	stripespara	yellow	1	A	first	male	Age6									no
B0115	stripespara	yellow	1	A	first	male	Age7									no
B0115	stripespara	yellow	1	A	first	male	Age8									no
B0115	stripespara	yellow	1	A	first	male	Age9									no
B0116	stripespara	yellow	1	A	first	male	Age1									no
B0116	stripespara	yellow	1	A	first	male	Age2									no
B0116	stripespara	yellow	1	A	first	male	Age3	2	Day4	2	no	no	2			yes
B0116	stripespara	yellow	1	A	first	male	Age4	1	Day5	1				1		no
B0116	stripespara	yellow	1	A	first	male	Age5	1	Day6	1						no
B0116	stripespara	yellow	1	A	first	male	Age6	0	Day7	0				1		no
B0116	stripespara	yellow	1	A	first	male	Age7									no
B0116	stripespara	yellow	1	A	first	male	Age8									no
B0116	stripespara	yellow	1	A	first	male	Age9									no
B0117	stripespara	yellow	1	A	first	male	Age1									no
B0117	stripespara	yellow	1	A	first	male	Age2									no
B0117	stripespara	yellow	1	A	first	male	Age3	1	Day4	1	no	no	1			no
B0117	stripespara	yellow	1	A	first	male	Age4	0	Day5	0				1		no
B0117	stripespara	yellow	1	A	first	male	Age5	0	Day6	0						no
B0117	stripespara	yellow	1	A	first	male	Age6									no
B0117	stripespara	yellow	1	A	first	male	Age7									no
B0117	stripespara	yellow	1	A	first	male	Age8									no
B0117	stripespara	yellow	1	A	first	male	Age9									no
B0118	stripespara	yellow	1	A	first	male	Age1									no
B0118	stripespara	yellow	1	A	first	male	Age2									no
B0118	stripespara	yellow	1	A	first	male	Age3	1	Day4	1			1			no
B0118	stripespara	yellow	1	A	first	male	Age4	0	Day5	0				1		no
B0118	stripespara	yellow	1	A	first	male	Age5	0	Day6	0						no
B0118	stripespara	yellow	1	A	first	male	Age6	1	Day7	1	yes	no	1		1	no
B0118	stripespara	yellow	1	A	first	male	Age7	0	Day8	0				1		no
B0118	stripespara	yellow	1	A	first	male	Age8	0	Day9	0						no
B0118	stripespara	yellow	1	A	first	male	Age9									no
B0119	stripespara	yellow	1	A	first	male	Age1									no
B0119	stripespara	yellow	1	A	first	male	Age2									no
B0119	stripespara	yellow	1	A	first	male	Age3	1	Day4	1			1			no
B0119	stripespara	yellow	1	A	first	male	Age4	0	Day5	0				1		no
B0119	stripespara	yellow	1	A	first	male	Age5	0	Day6	0						no
B0119	stripespara	yellow	1	A	first	male	Age6	1	Day7	1	yes	no	1		1	no
B0119	stripespara	yellow	1	A	first	male	Age7	0	Day8	0				1		no
B0119	stripespara	yellow	1	A	first	male	Age8	0	Day9	0						no
B0119	stripespara	yellow	1	A	first	male	Age9									no
B0120	stripespara	yellow	1	A	first	male	Age1									no
B0120	stripespara	yellow	1	A	first	male	Age2									no
B0120	stripespara	yellow	1	A	first	male	Age3									no
B0120	stripespara	yellow	1	A	first	male	Age4	1	Day5	1	no	no	1			no
B0120	stripespara	yellow	1	A	first	male	Age5	0	Day6	0				1		no
B0120	stripespara	yellow	1	A	first	male	Age6	0	Day7	0						no
B0120	stripespara	yellow	1	A	first	male	Age7	0	Day8	0						no
B0120	stripespara	yellow	1	A	first	male	Age8	0	Day9	0						no
B0120	stripespara	yellow	1	A	first	male	Age9									no
B0121	stripespara	yellow	1	A	first	male	Age1									no
B0121	stripespara	yellow	1	A	first	male	Age2									no
B0121	stripespara	yellow	1	A	first	male	Age3									no
B0121	stripespara	yellow	1	A	first	male	Age4	1	Day5	1	no	no	1			no
B0121	stripespara	yellow	1	A	first	male	Age5	0	Day6	0				1		no
B0121	stripespara	yellow	1	A	first	male	Age6	0	Day7	0						no
B0121	stripespara	yellow	1	A	first	male	Age7									no
B0121	stripespara	yellow	1	A	first	male	Age8	0	Day9	0						no
B0121	stripespara	yellow	1	A	first	male	Age9									no
B0122	stripespara	yellow	1	A	first	male	Age1									no
B0122	stripespara	yellow	1	A	first	male	Age2									no
B0122	stripespara	yellow	1	A	first	male	Age3									no
B0122	stripespara	yellow	1	A	first	male	Age4	1	Day5	1			1			no
B0122	stripespara	yellow	1	A	first	male	Age5	2	Day6	2	yes	yes	1		1	yes
B0122	stripespara	yellow	1	A	first	male	Age6	1	Day7	1				1		no
B0122	stripespara	yellow	1	A	first	male	Age7									no
B0122	stripespara	yellow	1	A	first	male	Age8	0	Day9	0				1		no
B0122	stripespara	yellow	1	A	first	male	Age9									no
B0123	stripespara	yellow	1	A	first	male	Age1									no
B0123	stripespara	yellow	1	A	first	male	Age2									no
B0123	stripespara	yellow	1	A	first	male	Age3									no
B0123	stripespara	yellow	1	A	first	male	Age4	1	Day5	1			1			no
B0123	stripespara	yellow	1	A	first	male	Age5	1	Day6	1						no
B0123	stripespara	yellow	1	A	first	male	Age6	0	Day7	0				1		no
B0123	stripespara	yellow	1	A	first	male	Age7	1	Day8	1	yes	no	1		1	no
B0123	stripespara	yellow	1	A	first	male	Age8	0	Day9	0				1		no
B0123	stripespara	yellow	1	A	first	male	Age9									no
B0124	stripespara	yellow	1	A	first	male	Age1									no
B0124	stripespara	yellow	1	A	first	male	Age2									no
B0124	stripespara	yellow	1	A	first	male	Age3									no
B0124	stripespara	yellow	1	A	first	male	Age4	1	Day5	1	no	no	1			no
B0124	stripespara	yellow	1	A	first	male	Age5	0	Day6	0				1		no
B0124	stripespara	yellow	1	A	first	male	Age6	0	Day7	0						no
B0124	stripespara	yellow	1	A	first	male	Age7	0	Day8	0						no
B0124	stripespara	yellow	1	A	first	male	Age8	0	Day9	0						no
B0124	stripespara	yellow	1	A	first	male	Age9									no
B0125	stripespara	yellow	1	A	first	male	Age1									no
B0125	stripespara	yellow	1	A	first	male	Age2									no
B0125	stripespara	yellow	1	A	first	male	Age3									no
B0125	stripespara	yellow	1	A	first	male	Age4									no
B0125	stripespara	yellow	1	A	first	male	Age5	1	Day6	1	no	no	1			no
B0125	stripespara	yellow	1	A	first	male	Age6	0	Day7	0				1		no
B0125	stripespara	yellow	1	A	first	male	Age7	0	Day8	0						no
B0125	stripespara	yellow	1	A	first	male	Age8	0	Day9	0						no
B0125	stripespara	yellow	1	A	first	male	Age9									no
B0126	stripespara	yellow	1	A	first	male	Age1									no
B0126	stripespara	yellow	1	A	first	male	Age2									no
B0126	stripespara	yellow	1	A	first	male	Age3									no
B0126	stripespara	yellow	1	A	first	male	Age4									no
B0126	stripespara	yellow	1	A	first	male	Age5	1	Day6	1	no	no	1			no
B0126	stripespara	yellow	1	A	first	male	Age6	0	Day7	0				1		no
B0126	stripespara	yellow	1	A	first	male	Age7	0	Day8	0						no
B0126	stripespara	yellow	1	A	first	male	Age8	0	Day9	0						no
B0126	stripespara	yellow	1	A	first	male	Age9									no
B0127	stripespara	yellow	1	A	first	male	Age1									no
B0127	stripespara	yellow	1	A	first	male	Age2									no
B0127	stripespara	yellow	1	A	first	male	Age3									no
B0127	stripespara	yellow	1	A	first	male	Age4									no
B0127	stripespara	yellow	1	A	first	male	Age5	1	Day6	1	no	no	1			no
B0127	stripespara	yellow	1	A	first	male	Age6	0	Day7	0				1		no
B0127	stripespara	yellow	1	A	first	male	Age7	0	Day8	0						no
B0127	stripespara	yellow	1	A	first	male	Age8	0	Day9	0						no
B0127	stripespara	yellow	1	A	first	male	Age9									no
B0128	stripespara	yellow	1	A	first	male	Age1									no
B0128	stripespara	yellow	1	A	first	male	Age2									no
B0128	stripespara	yellow	1	A	first	male	Age3									no
B0128	stripespara	yellow	1	A	first	male	Age4									no
B0128	stripespara	yellow	1	A	first	male	Age5									no
B0128	stripespara	yellow	1	A	first	male	Age6									no
B0128	stripespara	yellow	1	A	first	male	Age7	1	Day8	1	no	no	1			no
B0128	stripespara	yellow	1	A	first	male	Age8	0	Day9	0				1		no
B0128	stripespara	yellow	1	A	first	male	Age9									no
B0129	stripespara	yellow	1	A	first	male	Age1									no
B0129	stripespara	yellow	1	A	first	male	Age2									no
B0129	stripespara	yellow	1	A	first	male	Age3									no
B0129	stripespara	yellow	1	A	first	male	Age4									no
B0129	stripespara	yellow	1	A	first	male	Age5									no
B0129	stripespara	yellow	1	A	first	male	Age6									no
B0129	stripespara	yellow	1	A	first	male	Age7									no
B0129	stripespara	yellow	1	A	first	male	Age8	1	Day9	1	no	no	1			no
B0129	stripespara	yellow	1	A	first	male	Age9									no
B0130	stripespara	white	1	A	first	male	Age1									no
B0130	stripespara	white	1	A	first	male	Age2	3	Day4	3			3			yes
B0130	stripespara	white	1	A	first	male	Age3	1	Day5	1				2		no
B0130	stripespara	white	1	A	first	male	Age4	0	Day6	0				1		no
B0130	stripespara	white	1	A	first	male	Age5	0	Day7	0						no
B0130	stripespara	white	1	A	first	male	Age6	1	Day8	1	yes	yes	1		1	no
B0130	stripespara	white	1	A	first	male	Age7	0	Day9	0				1		no
B0130	stripespara	white	1	A	first	male	Age8									no
B0130	stripespara	white	1	A	first	male	Age9									no
B0131	stripespara	white	1	A	first	male	Age1									no
B0131	stripespara	white	1	A	first	male	Age2	3	Day4	3	no	no	3			yes
B0131	stripespara	white	1	A	first	male	Age3	2	Day5	2				1
B0131	stripespara	white	1	A	first	male	Age4	2	Day6	2
B0131	stripespara	white	1	A	first	male	Age5	1	Day7	1				1		no
B0131	stripespara	white	1	A	first	male	Age6	0	Day8	0				1		no
B0131	stripespara	white	1	A	first	male	Age7	0	Day9	0						no
B0131	stripespara	white	1	A	first	male	Age8									no
B0131	stripespara	white	1	A	first	male	Age9									no
B0132	stripespara	white	1	A	first	male	Age1									no
B0132	stripespara	white	1	A	first	male	Age2	2	Day4	2	no	no	2			yes
B0132	stripespara	white	1	A	first	male	Age3	0	Day5	0				2		no
B0132	stripespara	white	1	A	first	male	Age4	0	Day6	0						no
B0132	stripespara	white	1	A	first	male	Age5									no
B0132	stripespara	white	1	A	first	male	Age6									no
B0132	stripespara	white	1	A	first	male	Age7									no
B0132	stripespara	white	1	A	first	male	Age8									no
B0132	stripespara	white	1	A	first	male	Age9									no
B0133	stripespara	white	1	A	first	male	Age1									no
B0133	stripespara	white	1	A	first	male	Age2	1	Day4	1			1			no
B0133	stripespara	white	1	A	first	male	Age3	1	Day5	1						no
B0133	stripespara	white	1	A	first	male	Age4	0	Day6	0				1		no
B0133	stripespara	white	1	A	first	male	Age5	0	Day7	0						no
B0133	stripespara	white	1	A	first	male	Age6	1	Day8	1	yes	no	1		1	no
B0133	stripespara	white	1	A	first	male	Age7	0	Day9	0				1		no
B0133	stripespara	white	1	A	first	male	Age8									no
B0133	stripespara	white	1	A	first	male	Age9									no
B0134	stripespara	white	1	A	first	male	Age1									no
B0134	stripespara	white	1	A	first	male	Age2	1	Day4	1	no	no	1			no
B0134	stripespara	white	1	A	first	male	Age3	0	Day5	0				1		no
B0134	stripespara	white	1	A	first	male	Age4	0	Day6	0						no
B0134	stripespara	white	1	A	first	male	Age5	0	Day7	0						no
B0134	stripespara	white	1	A	first	male	Age6									no
B0134	stripespara	white	1	A	first	male	Age7									no
B0134	stripespara	white	1	A	first	male	Age8									no
B0134	stripespara	white	1	A	first	male	Age9									no
B0135	stripespara	white	1	A	first	male	Age1									no
B0135	stripespara	white	1	A	first	male	Age2	1	Day4	1	no	no	1			no
B0135	stripespara	white	1	A	first	male	Age3	0	Day5	0				1		no
B0135	stripespara	white	1	A	first	male	Age4	0	Day6	0						no
B0135	stripespara	white	1	A	first	male	Age5	0	Day7	0						no
B0135	stripespara	white	1	A	first	male	Age6	0	Day8	0						no
B0135	stripespara	white	1	A	first	male	Age7	0	Day9	0						no
B0135	stripespara	white	1	A	first	male	Age8									no
B0135	stripespara	white	1	A	first	male	Age9									no
B0136	stripespara	white	1	A	first	male	Age1									no
B0136	stripespara	white	1	A	first	male	Age2	2	Day4	2	no	no	2			yes
B0136	stripespara	white	1	A	first	male	Age3									no
B0136	stripespara	white	1	A	first	male	Age4	0	Day6	0				2		no
B0136	stripespara	white	1	A	first	male	Age5	0	Day7	0						no
B0136	stripespara	white	1	A	first	male	Age6	0	Day8	0						no
B0136	stripespara	white	1	A	first	male	Age7									no
B0136	stripespara	white	1	A	first	male	Age8									no
B0136	stripespara	white	1	A	first	male	Age9									no
B0137	stripespara	white	1	A	first	male	Age1									no
B0137	stripespara	white	1	A	first	male	Age2	1	Day4	1	no	no	1			no
B0137	stripespara	white	1	A	first	male	Age3	0	Day5	0				1		no
B0137	stripespara	white	1	A	first	male	Age4									no
B0137	stripespara	white	1	A	first	male	Age5									no
B0137	stripespara	white	1	A	first	male	Age6									no
B0137	stripespara	white	1	A	first	male	Age7									no
B0137	stripespara	white	1	A	first	male	Age8									no
B0137	stripespara	white	1	A	first	male	Age9									no
B0138	stripespara	white	1	A	first	male	Age1									no
B0138	stripespara	white	1	A	first	male	Age2	1	Day4	1	no	no	1			no
B0138	stripespara	white	1	A	first	male	Age3	1	Day5	1						no
B0138	stripespara	white	1	A	first	male	Age4	1	Day6	1						no
B0138	stripespara	white	1	A	first	male	Age5	1	Day7	1						no
B0138	stripespara	white	1	A	first	male	Age6	1	Day8	1						no
B0138	stripespara	white	1	A	first	male	Age7									no
B0138	stripespara	white	1	A	first	male	Age8									no
B0138	stripespara	white	1	A	first	male	Age9									no
B0139	stripespara	white	1	A	first	male	Age1									no
B0139	stripespara	white	1	A	first	male	Age2	1	Day4	1	no	no	1			no
B0139	stripespara	white	1	A	first	male	Age3	0	Day5	0				1		no
B0139	stripespara	white	1	A	first	male	Age4	0	Day6	0						no
B0139	stripespara	white	1	A	first	male	Age5	0	Day7	0						no
B0139	stripespara	white	1	A	first	male	Age6	0	Day8	0						no
B0139	stripespara	white	1	A	first	male	Age7	0	Day9	0						no
B0139	stripespara	white	1	A	first	male	Age8									no
B0139	stripespara	white	1	A	first	male	Age9									no
B0140	stripespara	white	1	A	first	male	Age1									no
B0140	stripespara	white	1	A	first	male	Age2									no
B0140	stripespara	white	1	A	first	male	Age3	2	Day5	2	no	no	2			yes
B0140	stripespara	white	1	A	first	male	Age4									no
B0140	stripespara	white	1	A	first	male	Age5									no
B0140	stripespara	white	1	A	first	male	Age6									no
B0140	stripespara	white	1	A	first	male	Age7									no
B0140	stripespara	white	1	A	first	male	Age8									no
B0140	stripespara	white	1	A	first	male	Age9									no
B0141	stripespara	white	1	A	first	male	Age1									no
B0141	stripespara	white	1	A	first	male	Age2									no
B0141	stripespara	white	1	A	first	male	Age3	1	Day5	1			1			no
B0141	stripespara	white	1	A	first	male	Age4	2	Day6	2	yes	yes	1		1	yes
B0141	stripespara	white	1	A	first	male	Age5	0	Day7	0				2		no
B0141	stripespara	white	1	A	first	male	Age6									no
B0141	stripespara	white	1	A	first	male	Age7									no
B0141	stripespara	white	1	A	first	male	Age8									no
B0141	stripespara	white	1	A	first	male	Age9									no
B0142	stripespara	white	1	A	first	male	Age1									no
B0142	stripespara	white	1	A	first	male	Age2									no
B0142	stripespara	white	1	A	first	male	Age3	1	Day5	1	no	no	1			no
B0142	stripespara	white	1	A	first	male	Age4	1	Day6	1						no
B0142	stripespara	white	1	A	first	male	Age5	0	Day7	0				1		no
B0142	stripespara	white	1	A	first	male	Age6	0	Day8	0						no
B0142	stripespara	white	1	A	first	male	Age7	0	Day9	0						no
B0142	stripespara	white	1	A	first	male	Age8									no
B0142	stripespara	white	1	A	first	male	Age9									no
B0143	stripespara	white	1	A	first	male	Age1									no
B0143	stripespara	white	1	A	first	male	Age2									no
B0143	stripespara	white	1	A	first	male	Age3									no
B0143	stripespara	white	1	A	first	male	Age4	1	Day6	1			1			no
B0143	stripespara	white	1	A	first	male	Age5	1	Day7	1						no
B0143	stripespara	white	1	A	first	male	Age6	2	Day8	2	yes	yes	1		1	yes
B0143	stripespara	white	1	A	first	male	Age7	0	Day9	0				2		no
B0143	stripespara	white	1	A	first	male	Age8									no
B0143	stripespara	white	1	A	first	male	Age9									no
B0144	stripespara	white	1	A	first	male	Age1									no
B0144	stripespara	white	1	A	first	male	Age2									no
B0144	stripespara	white	1	A	first	male	Age3									no
B0144	stripespara	white	1	A	first	male	Age4									no
B0144	stripespara	white	1	A	first	male	Age5	1	Day7	1	no	no	1			no
B0144	stripespara	white	1	A	first	male	Age6	1	Day8	1						no
B0144	stripespara	white	1	A	first	male	Age7	1	Day9	1						no
B0144	stripespara	white	1	A	first	male	Age8									no
B0144	stripespara	white	1	A	first	male	Age9									no
B0145	stripespara	white	1	A	first	male	Age1									no
B0145	stripespara	white	1	A	first	male	Age2									no
B0145	stripespara	white	1	A	first	male	Age3									no
B0145	stripespara	white	1	A	first	male	Age4									no
B0145	stripespara	white	1	A	first	male	Age5	1	Day7	1	no	no	1			no
B0145	stripespara	white	1	A	first	male	Age6	0	Day8	0				1		no
B0145	stripespara	white	1	A	first	male	Age7									no
B0145	stripespara	white	1	A	first	male	Age8									no
B0145	stripespara	white	1	A	first	male	Age9									no
B0146	stripespara	green	1	A	first	male	Age1									no
B0146	stripespara	green	1	A	first	male	Age2	2	Day5	2	no	no	2			yes
B0146	stripespara	green	1	A	first	male	Age3	1	Day6	1				1		no
B0146	stripespara	green	1	A	first	male	Age4	0	Day7	0				1		no
B0146	stripespara	green	1	A	first	male	Age5	0	Day8	0						no
B0146	stripespara	green	1	A	first	male	Age6									no
B0146	stripespara	green	1	A	first	male	Age7									no
B0146	stripespara	green	1	A	first	male	Age8									no
B0146	stripespara	green	1	A	first	male	Age9									no
B0147	stripespara	green	1	A	first	male	Age1									no
B0147	stripespara	green	1	A	first	male	Age2	1	Day5	1			1			no
B0147	stripespara	green	1	A	first	male	Age3	2	Day6	2	yes	yes	1		1	yes
B0147	stripespara	green	1	A	first	male	Age4	0	Day7	0				2		no
B0147	stripespara	green	1	A	first	male	Age5	0	Day8	0						no
B0147	stripespara	green	1	A	first	male	Age6	0	Day9	0						no
B0147	stripespara	green	1	A	first	male	Age7									no
B0147	stripespara	green	1	A	first	male	Age8									no
B0147	stripespara	green	1	A	first	male	Age9									no
B0148	stripespara	green	1	A	first	male	Age1									no
B0148	stripespara	green	1	A	first	male	Age2	1	Day5	1	no	no	1			no
B0148	stripespara	green	1	A	first	male	Age3	0	Day6	0				1		no
B0148	stripespara	green	1	A	first	male	Age4	0	Day7	0						no
B0148	stripespara	green	1	A	first	male	Age5	0	Day8	0						no
B0148	stripespara	green	1	A	first	male	Age6	0	Day9	0						no
B0148	stripespara	green	1	A	first	male	Age7									no
B0148	stripespara	green	1	A	first	male	Age8									no
B0148	stripespara	green	1	A	first	male	Age9									no
B0149	stripespara	green	1	A	first	male	Age1									no
B0149	stripespara	green	1	A	first	male	Age2	1	Day5	1	no	no	1			no
B0149	stripespara	green	1	A	first	male	Age3	1	Day6	1						no
B0149	stripespara	green	1	A	first	male	Age4	0	Day7	0				1		no
B0149	stripespara	green	1	A	first	male	Age5	0	Day8	0						no
B0149	stripespara	green	1	A	first	male	Age6	0	Day9	0						no
B0149	stripespara	green	1	A	first	male	Age7									no
B0149	stripespara	green	1	A	first	male	Age8									no
B0149	stripespara	green	1	A	first	male	Age9									no
B0150	stripespara	green	1	A	first	male	Age1									no
B0150	stripespara	green	1	A	first	male	Age2	1	Day5	1	no	no	1			no
B0150	stripespara	green	1	A	first	male	Age3	1	Day6	1						no
B0150	stripespara	green	1	A	first	male	Age4	0	Day7	0				1		no
B0150	stripespara	green	1	A	first	male	Age5	0	Day8	0						no
B0150	stripespara	green	1	A	first	male	Age6	0	Day9	0						no
B0150	stripespara	green	1	A	first	male	Age7									no
B0150	stripespara	green	1	A	first	male	Age8									no
B0150	stripespara	green	1	A	first	male	Age9									no
B0151	stripespara	green	1	A	first	male	Age1									no
B0151	stripespara	green	1	A	first	male	Age2	1	Day5	1	no	no	1			no
B0151	stripespara	green	1	A	first	male	Age3	1	Day6	1						no
B0151	stripespara	green	1	A	first	male	Age4	0	Day7	0				1		no
B0151	stripespara	green	1	A	first	male	Age5	0	Day8	0						no
B0151	stripespara	green	1	A	first	male	Age6	0	Day9	0						no
B0151	stripespara	green	1	A	first	male	Age7									no
B0151	stripespara	green	1	A	first	male	Age8									no
B0151	stripespara	green	1	A	first	male	Age9									no
B0152	stripespara	green	1	A	first	male	Age1									no
B0152	stripespara	green	1	A	first	male	Age2	2	Day5	2	no	no	2			yes
B0152	stripespara	green	1	A	first	male	Age3	1	Day6	1				1		no
B0152	stripespara	green	1	A	first	male	Age4	0	Day7	0				1		no
B0152	stripespara	green	1	A	first	male	Age5	0	Day8	0						no
B0152	stripespara	green	1	A	first	male	Age6	0	Day9	0						no
B0152	stripespara	green	1	A	first	male	Age7									no
B0152	stripespara	green	1	A	first	male	Age8									no
B0152	stripespara	green	1	A	first	male	Age9									no
B0153	stripespara	green	1	A	first	male	Age1									no
B0153	stripespara	green	1	A	first	male	Age2	1	Day5	1			1			no
B0153	stripespara	green	1	A	first	male	Age3	0	Day6	0				1		no
B0153	stripespara	green	1	A	first	male	Age4	0	Day7	0						no
B0153	stripespara	green	1	A	first	male	Age5	1	Day8	1	yes	no	1		1	no
B0153	stripespara	green	1	A	first	male	Age6	0	Day9	0				1		no
B0153	stripespara	green	1	A	first	male	Age7									no
B0153	stripespara	green	1	A	first	male	Age8									no
B0153	stripespara	green	1	A	first	male	Age9									no
B0154	stripespara	green	1	A	first	male	Age1									no
B0154	stripespara	green	1	A	first	male	Age2	1	Day5	1	no	no	1			no
B0154	stripespara	green	1	A	first	male	Age3									no
B0154	stripespara	green	1	A	first	male	Age4									no
B0154	stripespara	green	1	A	first	male	Age5									no
B0154	stripespara	green	1	A	first	male	Age6									no
B0154	stripespara	green	1	A	first	male	Age7									no
B0154	stripespara	green	1	A	first	male	Age8									no
B0154	stripespara	green	1	A	first	male	Age9									no
B0155	stripespara	green	1	A	first	male	Age1									no
B0155	stripespara	green	1	A	first	male	Age2	1	Day5	1	no	no	1			no
B0155	stripespara	green	1	A	first	male	Age3	0	Day6	0				1		no
B0155	stripespara	green	1	A	first	male	Age4	0	Day7	0						no
B0155	stripespara	green	1	A	first	male	Age5	0	Day8	0						no
B0155	stripespara	green	1	A	first	male	Age6	0	Day9	0						no
B0155	stripespara	green	1	A	first	male	Age7									no
B0155	stripespara	green	1	A	first	male	Age8									no
B0155	stripespara	green	1	A	first	male	Age9									no
B0156	stripespara	green	1	A	first	male	Age1									no
B0156	stripespara	green	1	A	first	male	Age2	1	Day5	1	no	no	1			no
B0156	stripespara	green	1	A	first	male	Age3	0	Day6	0				1		no
B0156	stripespara	green	1	A	first	male	Age4	0	Day7	0						no
B0156	stripespara	green	1	A	first	male	Age5	0	Day8	0						no
B0156	stripespara	green	1	A	first	male	Age6	0	Day9	0						no
B0156	stripespara	green	1	A	first	male	Age7									no
B0156	stripespara	green	1	A	first	male	Age8									no
B0156	stripespara	green	1	A	first	male	Age9									no
B0157	stripespara	green	1	A	first	male	Age1									no
B0157	stripespara	green	1	A	first	male	Age2									no
B0157	stripespara	green	1	A	first	male	Age3	1	Day6	1	no	no	1			no
B0157	stripespara	green	1	A	first	male	Age4	1	Day7	1						no
B0157	stripespara	green	1	A	first	male	Age5	0	Day8	0				1		no
B0157	stripespara	green	1	A	first	male	Age6	0	Day9	0						no
B0157	stripespara	green	1	A	first	male	Age7									no
B0157	stripespara	green	1	A	first	male	Age8									no
B0157	stripespara	green	1	A	first	male	Age9									no
B0158	stripespara	green	1	A	first	male	Age1									no
B0158	stripespara	green	1	A	first	male	Age2									no
B0158	stripespara	green	1	A	first	male	Age3	1	Day6	1	no	no	1			no
B0158	stripespara	green	1	A	first	male	Age4	1	Day7	1						no
B0158	stripespara	green	1	A	first	male	Age5	0	Day8	0				1		no
B0158	stripespara	green	1	A	first	male	Age6	0	Day9	0						no
B0158	stripespara	green	1	A	first	male	Age7									no
B0158	stripespara	green	1	A	first	male	Age8									no
B0158	stripespara	green	1	A	first	male	Age9									no
B0159	stripespara	green	1	A	first	male	Age1									no
B0159	stripespara	green	1	A	first	male	Age2									no
B0159	stripespara	green	1	A	first	male	Age3	2	Day6	2	no	no	2			yes
B0159	stripespara	green	1	A	first	male	Age4									no
B0159	stripespara	green	1	A	first	male	Age5									no
B0159	stripespara	green	1	A	first	male	Age6									no
B0159	stripespara	green	1	A	first	male	Age7									no
B0159	stripespara	green	1	A	first	male	Age8									no
B0159	stripespara	green	1	A	first	male	Age9									no
B0160	stripespara	green	1	A	first	male	Age1									no
B0160	stripespara	green	1	A	first	male	Age2									no
B0160	stripespara	green	1	A	first	male	Age3	1	Day6	1	no	no	1			no
B0160	stripespara	green	1	A	first	male	Age4	1	Day7	1						no
B0160	stripespara	green	1	A	first	male	Age5	0	Day8	0				1		no
B0160	stripespara	green	1	A	first	male	Age6	0	Day9	0						no
B0160	stripespara	green	1	A	first	male	Age7									no
B0160	stripespara	green	1	A	first	male	Age8									no
B0160	stripespara	green	1	A	first	male	Age9									no
B0161	stripespara	green	1	A	first	male	Age1									no
B0161	stripespara	green	1	A	first	male	Age2									no
B0161	stripespara	green	1	A	first	male	Age3	2	Day6	2	no	no	2			yes
B0161	stripespara	green	1	A	first	male	Age4	0	Day7	0				2		no
B0161	stripespara	green	1	A	first	male	Age5	0	Day8	0						no
B0161	stripespara	green	1	A	first	male	Age6	0	Day9	0						no
B0161	stripespara	green	1	A	first	male	Age7									no
B0161	stripespara	green	1	A	first	male	Age8									no
B0161	stripespara	green	1	A	first	male	Age9									no
B0162	stripespara	green	1	A	first	male	Age1									no
B0162	stripespara	green	1	A	first	male	Age2									no
B0162	stripespara	green	1	A	first	male	Age3									no
B0162	stripespara	green	1	A	first	male	Age4	1	Day7	1	no	no	1			no
B0162	stripespara	green	1	A	first	male	Age5	0	Day8	0				1		no
B0162	stripespara	green	1	A	first	male	Age6									no
B0162	stripespara	green	1	A	first	male	Age7									no
B0162	stripespara	green	1	A	first	male	Age8									no
B0162	stripespara	green	1	A	first	male	Age9									no
B0163	stripespara	pink	1	A	first	male	Age1									no
B0163	stripespara	pink	1	A	first	male	Age2	1	Day6	1	no	no	1			no
B0163	stripespara	pink	1	A	first	male	Age3	1	Day7	1						no
B0163	stripespara	pink	1	A	first	male	Age4	0	Day8	0				1		no
B0163	stripespara	pink	1	A	first	male	Age5	0	Day9	0						no
B0163	stripespara	pink	1	A	first	male	Age6									no
B0163	stripespara	pink	1	A	first	male	Age7									no
B0163	stripespara	pink	1	A	first	male	Age8									no
B0163	stripespara	pink	1	A	first	male	Age9									no
B0164	stripespara	pink	1	A	first	male	Age1									no
B0164	stripespara	pink	1	A	first	male	Age2	3	Day6	3	no	no	3			yes
B0164	stripespara	pink	1	A	first	male	Age3	0	Day7	0				3		no
B0164	stripespara	pink	1	A	first	male	Age4	0	Day8	0						no
B0164	stripespara	pink	1	A	first	male	Age5									no
B0164	stripespara	pink	1	A	first	male	Age6									no
B0164	stripespara	pink	1	A	first	male	Age7									no
B0164	stripespara	pink	1	A	first	male	Age8									no
B0164	stripespara	pink	1	A	first	male	Age9									no
B0165	stripespara	pink	1	A	first	male	Age1									no
B0165	stripespara	pink	1	A	first	male	Age2	3	Day6	3	no	no	3			yes
B0165	stripespara	pink	1	A	first	male	Age3	2	Day7	2				1
B0165	stripespara	pink	1	A	first	male	Age4	0	Day8	0				2		no
B0165	stripespara	pink	1	A	first	male	Age5	0	Day9	0						no
B0165	stripespara	pink	1	A	first	male	Age6									no
B0165	stripespara	pink	1	A	first	male	Age7									no
B0165	stripespara	pink	1	A	first	male	Age8									no
B0165	stripespara	pink	1	A	first	male	Age9									no
B0166	workergain	blue	1	A	first	female	Age1									no
B0166	workergain	blue	1	A	first	female	Age2	1	Day2	1	no	no	1			no
B0166	workergain	blue	1	A	first	female	Age3	0	Day3	0				1		no
B0166	workergain	blue	1	A	first	female	Age4	0	Day4	0						no
B0166	workergain	blue	1	A	first	female	Age5	0	Day5	0						no
B0166	workergain	blue	1	A	first	female	Age6	0	Day6	0						no
B0166	workergain	blue	1	A	first	female	Age7	0	Day7	0						no
B0166	workergain	blue	1	A	first	female	Age8	0	Day8	0						no
B0166	workergain	blue	1	A	first	female	Age9	0	Day9	0						no
B0167	workergain	blue	1	A	first	female	Age1									no
B0167	workergain	blue	1	A	first	female	Age2	1	Day2	1	no	no	1			no
B0167	workergain	blue	1	A	first	female	Age3	0	Day3	0				1		no
B0167	workergain	blue	1	A	first	female	Age4	0	Day4	0						no
B0167	workergain	blue	1	A	first	female	Age5	0	Day5	0						no
B0167	workergain	blue	1	A	first	female	Age6	0	Day6	0						no
B0167	workergain	blue	1	A	first	female	Age7	0	Day7	0						no
B0167	workergain	blue	1	A	first	female	Age8	0	Day8	0						no
B0167	workergain	blue	1	A	first	female	Age9	0	Day9	0						no
B0168	workergain	blue	1	A	first	female	Age1									no
B0168	workergain	blue	1	A	first	female	Age2	1	Day2	1	no	no	1			no
B0168	workergain	blue	1	A	first	female	Age3	0	Day3	0				1		no
B0168	workergain	blue	1	A	first	female	Age4	0	Day4	0						no
B0168	workergain	blue	1	A	first	female	Age5	0	Day5	0						no
B0168	workergain	blue	1	A	first	female	Age6	0	Day6	0						no
B0168	workergain	blue	1	A	first	female	Age7	0	Day7	0						no
B0168	workergain	blue	1	A	first	female	Age8	0	Day8	0						no
B0168	workergain	blue	1	A	first	female	Age9	0	Day9	0						no
B0169	workergain	blue	1	A	first	female	Age1									no
B0169	workergain	blue	1	A	first	female	Age2	1	Day2	1	no	no	1			no
B0169	workergain	blue	1	A	first	female	Age3									no
B0169	workergain	blue	1	A	first	female	Age4									no
B0169	workergain	blue	1	A	first	female	Age5									no
B0169	workergain	blue	1	A	first	female	Age6									no
B0169	workergain	blue	1	A	first	female	Age7									no
B0169	workergain	blue	1	A	first	female	Age8									no
B0169	workergain	blue	1	A	first	female	Age9									no
B0170	workergain	blue	1	A	first	female	Age1									no
B0170	workergain	blue	1	A	first	female	Age2	1	Day2	1	no	no	1			no
B0170	workergain	blue	1	A	first	female	Age3	0	Day3	0				1		no
B0170	workergain	blue	1	A	first	female	Age4	0	Day4	0						no
B0170	workergain	blue	1	A	first	female	Age5	0	Day5	0						no
B0170	workergain	blue	1	A	first	female	Age6	0	Day6	0						no
B0170	workergain	blue	1	A	first	female	Age7	0	Day7	0						no
B0170	workergain	blue	1	A	first	female	Age8									no
B0170	workergain	blue	1	A	first	female	Age9									no
B0171	workergain	blue	1	A	first	female	Age1									no
B0171	workergain	blue	1	A	first	female	Age2	1	Day2	1	no	no	1			no
B0171	workergain	blue	1	A	first	female	Age3	0	Day3	0				1		no
B0171	workergain	blue	1	A	first	female	Age4									no
B0171	workergain	blue	1	A	first	female	Age5	0	Day5	0						no
B0171	workergain	blue	1	A	first	female	Age6	0	Day6	0						no
B0171	workergain	blue	1	A	first	female	Age7	0	Day7	0						no
B0171	workergain	blue	1	A	first	female	Age8	0	Day8	0						no
B0171	workergain	blue	1	A	first	female	Age9	0	Day9	0						no
B0172	workergain	blue	1	A	first	female	Age1									no
B0172	workergain	blue	1	A	first	female	Age2	1	Day2	1	no	no	1			no
B0172	workergain	blue	1	A	first	female	Age3	0	Day3	0				1		no
B0172	workergain	blue	1	A	first	female	Age4	0	Day4	0						no
B0172	workergain	blue	1	A	first	female	Age5	0	Day5	0						no
B0172	workergain	blue	1	A	first	female	Age6	0	Day6	0						no
B0172	workergain	blue	1	A	first	female	Age7									no
B0172	workergain	blue	1	A	first	female	Age8									no
B0172	workergain	blue	1	A	first	female	Age9									no
B0173	workergain	blue	1	A	first	female	Age1									no
B0173	workergain	blue	1	A	first	female	Age2	1	Day2	1	no	no	1			no
B0173	workergain	blue	1	A	first	female	Age3	1	Day3	1						no
B0173	workergain	blue	1	A	first	female	Age4	0	Day4	0				1		no
B0173	workergain	blue	1	A	first	female	Age5	0	Day5	0						no
B0173	workergain	blue	1	A	first	female	Age6	0	Day6	0						no
B0173	workergain	blue	1	A	first	female	Age7									no
B0173	workergain	blue	1	A	first	female	Age8									no
B0173	workergain	blue	1	A	first	female	Age9									no
B0174	workergain	blue	1	A	first	female	Age1									no
B0174	workergain	blue	1	A	first	female	Age2									no
B0174	workergain	blue	1	A	first	female	Age3	1	Day3	1	no	no	1			no
B0174	workergain	blue	1	A	first	female	Age4	0	Day4	0				1		no
B0174	workergain	blue	1	A	first	female	Age5	0	Day5	0						no
B0174	workergain	blue	1	A	first	female	Age6	0	Day6	0						no
B0174	workergain	blue	1	A	first	female	Age7	0	Day7	0						no
B0174	workergain	blue	1	A	first	female	Age8	0	Day8	0						no
B0174	workergain	blue	1	A	first	female	Age9	0	Day9	0						no
B0175	workergain	blue	1	A	first	female	Age1									no
B0175	workergain	blue	1	A	first	female	Age2									no
B0175	workergain	blue	1	A	first	female	Age3	1	Day3	1	no	no	1			no
B0175	workergain	blue	1	A	first	female	Age4	0	Day4	0				1		no
B0175	workergain	blue	1	A	first	female	Age5	0	Day5	0						no
B0175	workergain	blue	1	A	first	female	Age6	0	Day6	0						no
B0175	workergain	blue	1	A	first	female	Age7	0	Day7	0						no
B0175	workergain	blue	1	A	first	female	Age8									no
B0175	workergain	blue	1	A	first	female	Age9									no
B0176	workergain	blue	1	A	first	female	Age1									no
B0176	workergain	blue	1	A	first	female	Age2									no
B0176	workergain	blue	1	A	first	female	Age3	1	Day3	1	no	no	1			no
B0176	workergain	blue	1	A	first	female	Age4	0	Day4	0				1		no
B0176	workergain	blue	1	A	first	female	Age5									no
B0176	workergain	blue	1	A	first	female	Age6									no
B0176	workergain	blue	1	A	first	female	Age7									no
B0176	workergain	blue	1	A	first	female	Age8									no
B0176	workergain	blue	1	A	first	female	Age9									no
B0177	workergain	blue	1	A	first	female	Age1									no
B0177	workergain	blue	1	A	first	female	Age2									no
B0177	workergain	blue	1	A	first	female	Age3	1	Day3	1	no	no	1			no
B0177	workergain	blue	1	A	first	female	Age4	0	Day4	0				1		no
B0177	workergain	blue	1	A	first	female	Age5	0	Day5	0						no
B0177	workergain	blue	1	A	first	female	Age6	0	Day6	0						no
B0177	workergain	blue	1	A	first	female	Age7	0	Day7	0						no
B0177	workergain	blue	1	A	first	female	Age8	0	Day8	0						no
B0177	workergain	blue	1	A	first	female	Age9	0	Day9	0						no
B0178	workergain	blue	1	A	first	female	Age1									no
B0178	workergain	blue	1	A	first	female	Age2									no
B0178	workergain	blue	1	A	first	female	Age3	1	Day3	1	no	no	1			no
B0178	workergain	blue	1	A	first	female	Age4	0	Day4	0				1		no
B0178	workergain	blue	1	A	first	female	Age5									no
B0178	workergain	blue	1	A	first	female	Age6									no
B0178	workergain	blue	1	A	first	female	Age7									no
B0178	workergain	blue	1	A	first	female	Age8									no
B0178	workergain	blue	1	A	first	female	Age9									no
B0179	workergain	blue	1	A	first	female	Age1									no
B0179	workergain	blue	1	A	first	female	Age2									no
B0179	workergain	blue	1	A	first	female	Age3	1	Day3	1	no	no	1			no
B0179	workergain	blue	1	A	first	female	Age4	0	Day4	0				1		no
B0179	workergain	blue	1	A	first	female	Age5	0	Day5	0						no
B0179	workergain	blue	1	A	first	female	Age6	0	Day6	0						no
B0179	workergain	blue	1	A	first	female	Age7	0	Day7	0						no
B0179	workergain	blue	1	A	first	female	Age8	0	Day8	0						no
B0179	workergain	blue	1	A	first	female	Age9	0	Day9	0						no
B0180	workergain	blue	1	A	first	female	Age1									no
B0180	workergain	blue	1	A	first	female	Age2									no
B0180	workergain	blue	1	A	first	female	Age3									no
B0180	workergain	blue	1	A	first	female	Age4	1	Day4	1	no	no	1			no
B0180	workergain	blue	1	A	first	female	Age5	0	Day5	0				1		no
B0180	workergain	blue	1	A	first	female	Age6	0	Day6	0						no
B0180	workergain	blue	1	A	first	female	Age7	0	Day7	0						no
B0180	workergain	blue	1	A	first	female	Age8	0	Day8	0						no
B0180	workergain	blue	1	A	first	female	Age9	0	Day9	0						no
B0181	workergain	blue	1	A	first	female	Age1									no
B0181	workergain	blue	1	A	first	female	Age2									no
B0181	workergain	blue	1	A	first	female	Age3									no
B0181	workergain	blue	1	A	first	female	Age4	1	Day4	1	no	no	1			no
B0181	workergain	blue	1	A	first	female	Age5									no
B0181	workergain	blue	1	A	first	female	Age6									no
B0181	workergain	blue	1	A	first	female	Age7									no
B0181	workergain	blue	1	A	first	female	Age8									no
B0181	workergain	blue	1	A	first	female	Age9									no
B0182	workergain	blue	1	A	first	female	Age1									no
B0182	workergain	blue	1	A	first	female	Age2									no
B0182	workergain	blue	1	A	first	female	Age3									no
B0182	workergain	blue	1	A	first	female	Age4									no
B0182	workergain	blue	1	A	first	female	Age5	1	Day5	1	no	no	1			no
B0182	workergain	blue	1	A	first	female	Age6	1	Day6	1						no
B0182	workergain	blue	1	A	first	female	Age7	0	Day7	0				1		no
B0182	workergain	blue	1	A	first	female	Age8	0	Day8	0						no
B0182	workergain	blue	1	A	first	female	Age9	0	Day9	0						no
B0183	workergain	yellow	1	A	first	female	Age1									no
B0183	workergain	yellow	1	A	first	female	Age2	1	Day3	1	no	no	1			no
B0183	workergain	yellow	1	A	first	female	Age3	0	Day4	0				1		no
B0183	workergain	yellow	1	A	first	female	Age4	0	Day5	0						no
B0183	workergain	yellow	1	A	first	female	Age5	0	Day6	0						no
B0183	workergain	yellow	1	A	first	female	Age6	0	Day7	0						no
B0183	workergain	yellow	1	A	first	female	Age7									no
B0183	workergain	yellow	1	A	first	female	Age8									no
B0183	workergain	yellow	1	A	first	female	Age9									no
B0184	workergain	yellow	1	A	first	female	Age1									no
B0184	workergain	yellow	1	A	first	female	Age2	1	Day3	1	no	no	1			no
B0184	workergain	yellow	1	A	first	female	Age3	0	Day4	0				1		no
B0184	workergain	yellow	1	A	first	female	Age4	0	Day5	0						no
B0184	workergain	yellow	1	A	first	female	Age5	0	Day6	0						no
B0184	workergain	yellow	1	A	first	female	Age6	0	Day7	0						no
B0184	workergain	yellow	1	A	first	female	Age7	0	Day8	0						no
B0184	workergain	yellow	1	A	first	female	Age8	0	Day9	0						no
B0184	workergain	yellow	1	A	first	female	Age9									no
B0185	workergain	yellow	1	A	first	female	Age1									no
B0185	workergain	yellow	1	A	first	female	Age2	1	Day3	1	no	no	1			no
B0185	workergain	yellow	1	A	first	female	Age3	1	Day4	1						no
B0185	workergain	yellow	1	A	first	female	Age4	0	Day5	0				1		no
B0185	workergain	yellow	1	A	first	female	Age5	0	Day6	0						no
B0185	workergain	yellow	1	A	first	female	Age6									no
B0185	workergain	yellow	1	A	first	female	Age7									no
B0185	workergain	yellow	1	A	first	female	Age8									no
B0185	workergain	yellow	1	A	first	female	Age9									no
B0186	workergain	yellow	1	A	first	female	Age1									no
B0186	workergain	yellow	1	A	first	female	Age2	2	Day3	2	no	no	2			yes
B0186	workergain	yellow	1	A	first	female	Age3	0	Day4	0				2		no
B0186	workergain	yellow	1	A	first	female	Age4	0	Day5	0						no
B0186	workergain	yellow	1	A	first	female	Age5	0	Day6	0						no
B0186	workergain	yellow	1	A	first	female	Age6	0	Day7	0						no
B0186	workergain	yellow	1	A	first	female	Age7	0	Day8	0						no
B0186	workergain	yellow	1	A	first	female	Age8	0	Day9	0						no
B0186	workergain	yellow	1	A	first	female	Age9									no
B0187	workergain	yellow	1	A	first	female	Age1									no
B0187	workergain	yellow	1	A	first	female	Age2	1	Day3	1	no	no	1			no
B0187	workergain	yellow	1	A	first	female	Age3									no
B0187	workergain	yellow	1	A	first	female	Age4	0	Day5	0						no
B0187	workergain	yellow	1	A	first	female	Age5	0	Day6	0						no
B0187	workergain	yellow	1	A	first	female	Age6	0	Day7	0						no
B0187	workergain	yellow	1	A	first	female	Age7	0	Day8	0						no
B0187	workergain	yellow	1	A	first	female	Age8	0	Day9	0						no
B0187	workergain	yellow	1	A	first	female	Age9									no
B0188	workergain	yellow	1	A	first	female	Age1									no
B0188	workergain	yellow	1	A	first	female	Age2	1	Day3	1	no	no	1			no
B0188	workergain	yellow	1	A	first	female	Age3	1	Day4	1						no
B0188	workergain	yellow	1	A	first	female	Age4	0	Day5	0				1		no
B0188	workergain	yellow	1	A	first	female	Age5	0	Day6	0						no
B0188	workergain	yellow	1	A	first	female	Age6	0	Day7	0						no
B0188	workergain	yellow	1	A	first	female	Age7	0	Day8	0						no
B0188	workergain	yellow	1	A	first	female	Age8	0	Day9	0						no
B0188	workergain	yellow	1	A	first	female	Age9									no
B0189	workergain	yellow	1	A	first	female	Age1									no
B0189	workergain	yellow	1	A	first	female	Age2	1	Day3	1	no	no	1			no
B0189	workergain	yellow	1	A	first	female	Age3	1	Day4	1						no
B0189	workergain	yellow	1	A	first	female	Age4	0	Day5	0				1		no
B0189	workergain	yellow	1	A	first	female	Age5									no
B0189	workergain	yellow	1	A	first	female	Age6	0	Day7	0						no
B0189	workergain	yellow	1	A	first	female	Age7	0	Day8	0						no
B0189	workergain	yellow	1	A	first	female	Age8	0	Day9	0						no
B0189	workergain	yellow	1	A	first	female	Age9									no
B0190	workergain	yellow	1	A	first	female	Age1									no
B0190	workergain	yellow	1	A	first	female	Age2									no
B0190	workergain	yellow	1	A	first	female	Age3	1	Day4	1	no	no	1			no
B0190	workergain	yellow	1	A	first	female	Age4	0	Day5	0				1		no
B0190	workergain	yellow	1	A	first	female	Age5	0	Day6	0						no
B0190	workergain	yellow	1	A	first	female	Age6	0	Day7	0						no
B0190	workergain	yellow	1	A	first	female	Age7	0	Day8	0						no
B0190	workergain	yellow	1	A	first	female	Age8	0	Day9	0						no
B0190	workergain	yellow	1	A	first	female	Age9									no
B0191	workergain	yellow	1	A	first	female	Age1									no
B0191	workergain	yellow	1	A	first	female	Age2									no
B0191	workergain	yellow	1	A	first	female	Age3	1	Day4	1	no	no	1			no
B0191	workergain	yellow	1	A	first	female	Age4	0	Day5	0				1		no
B0191	workergain	yellow	1	A	first	female	Age5	0	Day6	0						no
B0191	workergain	yellow	1	A	first	female	Age6									no
B0191	workergain	yellow	1	A	first	female	Age7									no
B0191	workergain	yellow	1	A	first	female	Age8									no
B0191	workergain	yellow	1	A	first	female	Age9									no
B0192	workergain	yellow	1	A	first	female	Age1									no
B0192	workergain	yellow	1	A	first	female	Age2									no
B0192	workergain	yellow	1	A	first	female	Age3	1	Day4	1	no	no	1			no
B0192	workergain	yellow	1	A	first	female	Age4	1	Day5	1						no
B0192	workergain	yellow	1	A	first	female	Age5	1	Day6	1						no
B0192	workergain	yellow	1	A	first	female	Age6									no
B0192	workergain	yellow	1	A	first	female	Age7	0	Day8	0				1		no
B0192	workergain	yellow	1	A	first	female	Age8	0	Day9	0						no
B0192	workergain	yellow	1	A	first	female	Age9									no
B0193	workergain	yellow	1	A	first	female	Age1									no
B0193	workergain	yellow	1	A	first	female	Age2									no
B0193	workergain	yellow	1	A	first	female	Age3	1	Day4	1	no	no	1			no
B0193	workergain	yellow	1	A	first	female	Age4	0	Day5	0				1		no
B0193	workergain	yellow	1	A	first	female	Age5	0	Day6	0						no
B0193	workergain	yellow	1	A	first	female	Age6	0	Day7	0						no
B0193	workergain	yellow	1	A	first	female	Age7	0	Day8	0						no
B0193	workergain	yellow	1	A	first	female	Age8	0	Day9	0						no
B0193	workergain	yellow	1	A	first	female	Age9									no
B0194	workergain	yellow	1	A	first	female	Age1									no
B0194	workergain	yellow	1	A	first	female	Age2									no
B0194	workergain	yellow	1	A	first	female	Age3	1	Day4	1	no	no	1			no
B0194	workergain	yellow	1	A	first	female	Age4	0	Day5	0				1		no
B0194	workergain	yellow	1	A	first	female	Age5									no
B0194	workergain	yellow	1	A	first	female	Age6	0	Day7	0						no
B0194	workergain	yellow	1	A	first	female	Age7	0	Day8	0						no
B0194	workergain	yellow	1	A	first	female	Age8	0	Day9	0						no
B0194	workergain	yellow	1	A	first	female	Age9									no
B0195	workergain	yellow	1	A	first	female	Age1									no
B0195	workergain	yellow	1	A	first	female	Age2									no
B0195	workergain	yellow	1	A	first	female	Age3									no
B0195	workergain	yellow	1	A	first	female	Age4	1	Day5	1	no	no	1			no
B0195	workergain	yellow	1	A	first	female	Age5	0	Day6	0				1		no
B0195	workergain	yellow	1	A	first	female	Age6	0	Day7	0						no
B0195	workergain	yellow	1	A	first	female	Age7	0	Day8	0						no
B0195	workergain	yellow	1	A	first	female	Age8	0	Day9	0						no
B0195	workergain	yellow	1	A	first	female	Age9									no
B0196	workergain	yellow	1	A	first	female	Age1									no
B0196	workergain	yellow	1	A	first	female	Age2									no
B0196	workergain	yellow	1	A	first	female	Age3									no
B0196	workergain	yellow	1	A	first	female	Age4									no
B0196	workergain	yellow	1	A	first	female	Age5	1	Day6	1	no	no	1			no
B0196	workergain	yellow	1	A	first	female	Age6	1	Day7	1						no
B0196	workergain	yellow	1	A	first	female	Age7									no
B0196	workergain	yellow	1	A	first	female	Age8									no
B0196	workergain	yellow	1	A	first	female	Age9									no
B0197	workergain	yellow	1	A	first	female	Age1									no
B0197	workergain	yellow	1	A	first	female	Age2									no
B0197	workergain	yellow	1	A	first	female	Age3									no
B0197	workergain	yellow	1	A	first	female	Age4									no
B0197	workergain	yellow	1	A	first	female	Age5									no
B0197	workergain	yellow	1	A	first	female	Age6	1	Day7	1	no	no	1			no
B0197	workergain	yellow	1	A	first	female	Age7	1	Day8	1						no
B0197	workergain	yellow	1	A	first	female	Age8	1	Day9	1						no
B0197	workergain	yellow	1	A	first	female	Age9									no
B0198	workergain	yellow	1	A	first	female	Age1									no
B0198	workergain	yellow	1	A	first	female	Age2									no
B0198	workergain	yellow	1	A	first	female	Age3									no
B0198	workergain	yellow	1	A	first	female	Age4									no
B0198	workergain	yellow	1	A	first	female	Age5									no
B0198	workergain	yellow	1	A	first	female	Age6									no
B0198	workergain	yellow	1	A	first	female	Age7	1	Day8	1	no	no	1			no
B0198	workergain	yellow	1	A	first	female	Age8									no
B0198	workergain	yellow	1	A	first	female	Age9									no
B0199	workergain	white	1	A	first	female	Age1									no
B0199	workergain	white	1	A	first	female	Age2	1	Day4	1	no	no	1			no
B0199	workergain	white	1	A	first	female	Age3	0	Day5	0				1		no
B0199	workergain	white	1	A	first	female	Age4	0	Day6	0						no
B0199	workergain	white	1	A	first	female	Age5	0	Day7	0						no
B0199	workergain	white	1	A	first	female	Age6									no
B0199	workergain	white	1	A	first	female	Age7	0	Day9	0						no
B0199	workergain	white	1	A	first	female	Age8									no
B0199	workergain	white	1	A	first	female	Age9									no
B0200	workergain	white	1	A	first	female	Age1									no
B0200	workergain	white	1	A	first	female	Age2	2	Day4	2	no	no	2			yes
B0200	workergain	white	1	A	first	female	Age3	0	Day5	0				2		no
B0200	workergain	white	1	A	first	female	Age4	0	Day6	0						no
B0200	workergain	white	1	A	first	female	Age5	0	Day7	0						no
B0200	workergain	white	1	A	first	female	Age6	0	Day8	0						no
B0200	workergain	white	1	A	first	female	Age7	0	Day9	0						no
B0200	workergain	white	1	A	first	female	Age8									no
B0200	workergain	white	1	A	first	female	Age9									no
B0201	workergain	white	1	A	first	female	Age1									no
B0201	workergain	white	1	A	first	female	Age2	1	Day4	1	no	no	1			no
B0201	workergain	white	1	A	first	female	Age3	0	Day5	0				1		no
B0201	workergain	white	1	A	first	female	Age4	0	Day6	0						no
B0201	workergain	white	1	A	first	female	Age5									no
B0201	workergain	white	1	A	first	female	Age6									no
B0201	workergain	white	1	A	first	female	Age7									no
B0201	workergain	white	1	A	first	female	Age8									no
B0201	workergain	white	1	A	first	female	Age9									no
B0202	workergain	white	1	A	first	female	Age1									no
B0202	workergain	white	1	A	first	female	Age2	1	Day4	1	no	no	1			no
B0202	workergain	white	1	A	first	female	Age3	0	Day5	0				1		no
B0202	workergain	white	1	A	first	female	Age4	0	Day6	0						no
B0202	workergain	white	1	A	first	female	Age5	0	Day7	0						no
B0202	workergain	white	1	A	first	female	Age6	0	Day8	0						no
B0202	workergain	white	1	A	first	female	Age7	0	Day9	0						no
B0202	workergain	white	1	A	first	female	Age8									no
B0202	workergain	white	1	A	first	female	Age9									no
B0203	workergain	white	1	A	first	female	Age1									no
B0203	workergain	white	1	A	first	female	Age2	1	Day4	1	no	no	1			no
B0203	workergain	white	1	A	first	female	Age3	0	Day5	0				1		no
B0203	workergain	white	1	A	first	female	Age4	0	Day6	0						no
B0203	workergain	white	1	A	first	female	Age5	0	Day7	0						no
B0203	workergain	white	1	A	first	female	Age6	0	Day8	0						no
B0203	workergain	white	1	A	first	female	Age7	0	Day9	0						no
B0203	workergain	white	1	A	first	female	Age8									no
B0203	workergain	white	1	A	first	female	Age9									no
B0204	workergain	white	1	A	first	female	Age1									no
B0204	workergain	white	1	A	first	female	Age2	1	Day4	1	no	no	1			no
B0204	workergain	white	1	A	first	female	Age3	0	Day5	0				1		no
B0204	workergain	white	1	A	first	female	Age4	0	Day6	0						no
B0204	workergain	white	1	A	first	female	Age5	0	Day7	0						no
B0204	workergain	white	1	A	first	female	Age6	0	Day8	0						no
B0204	workergain	white	1	A	first	female	Age7	0	Day9	0						no
B0204	workergain	white	1	A	first	female	Age8									no
B0204	workergain	white	1	A	first	female	Age9									no
B0205	workergain	white	1	A	first	female	Age1									no
B0205	workergain	white	1	A	first	female	Age2	1	Day4	1	no	no	1			no
B0205	workergain	white	1	A	first	female	Age3	0	Day5	0				1		no
B0205	workergain	white	1	A	first	female	Age4	0	Day6	0						no
B0205	workergain	white	1	A	first	female	Age5	0	Day7	0						no
B0205	workergain	white	1	A	first	female	Age6	0	Day8	0						no
B0205	workergain	white	1	A	first	female	Age7	0	Day9	0						no
B0205	workergain	white	1	A	first	female	Age8									no
B0205	workergain	white	1	A	first	female	Age9									no
B0206	workergain	white	1	A	first	female	Age1									no
B0206	workergain	white	1	A	first	female	Age2									no
B0206	workergain	white	1	A	first	female	Age3	1	Day5	1	no	no	1			no
B0206	workergain	white	1	A	first	female	Age4	0	Day6	0				1		no
B0206	workergain	white	1	A	first	female	Age5									no
B0206	workergain	white	1	A	first	female	Age6									no
B0206	workergain	white	1	A	first	female	Age7									no
B0206	workergain	white	1	A	first	female	Age8									no
B0206	workergain	white	1	A	first	female	Age9									no
B0207	workergain	white	1	A	first	female	Age1									no
B0207	workergain	white	1	A	first	female	Age2									no
B0207	workergain	white	1	A	first	female	Age3	1	Day5	1	no	no	1			no
B0207	workergain	white	1	A	first	female	Age4	0	Day6	0				1		no
B0207	workergain	white	1	A	first	female	Age5	0	Day7	0						no
B0207	workergain	white	1	A	first	female	Age6	0	Day8	0						no
B0207	workergain	white	1	A	first	female	Age7	0	Day9	0						no
B0207	workergain	white	1	A	first	female	Age8									no
B0207	workergain	white	1	A	first	female	Age9									no
B0208	workergain	white	1	A	first	female	Age1									no
B0208	workergain	white	1	A	first	female	Age2									no
B0208	workergain	white	1	A	first	female	Age3	1	Day5	1	no	no	1			no
B0208	workergain	white	1	A	first	female	Age4	0	Day6	0				1		no
B0208	workergain	white	1	A	first	female	Age5	0	Day7	0						no
B0208	workergain	white	1	A	first	female	Age6	0	Day8	0						no
B0208	workergain	white	1	A	first	female	Age7	0	Day9	0						no
B0208	workergain	white	1	A	first	female	Age8									no
B0208	workergain	white	1	A	first	female	Age9									no
B0209	workergain	white	1	A	first	female	Age1									no
B0209	workergain	white	1	A	first	female	Age2									no
B0209	workergain	white	1	A	first	female	Age3	1	Day5	1	no	no	1			no
B0209	workergain	white	1	A	first	female	Age4	0	Day6	0				1		no
B0209	workergain	white	1	A	first	female	Age5	0	Day7	0						no
B0209	workergain	white	1	A	first	female	Age6	0	Day8	0						no
B0209	workergain	white	1	A	first	female	Age7	0	Day9	0						no
B0209	workergain	white	1	A	first	female	Age8									no
B0209	workergain	white	1	A	first	female	Age9									no
B0210	workergain	white	1	A	first	female	Age1									no
B0210	workergain	white	1	A	first	female	Age2									no
B0210	workergain	white	1	A	first	female	Age3									no
B0210	workergain	white	1	A	first	female	Age4									no
B0210	workergain	white	1	A	first	female	Age5									no
B0210	workergain	white	1	A	first	female	Age6	1	Day8	1	no	no	1			no
B0210	workergain	white	1	A	first	female	Age7	1	Day9	1						no
B0210	workergain	white	1	A	first	female	Age8									no
B0210	workergain	white	1	A	first	female	Age9									no
B0211	workergain	white	1	A	first	female	Age1									no
B0211	workergain	white	1	A	first	female	Age2									no
B0211	workergain	white	1	A	first	female	Age3									no
B0211	workergain	white	1	A	first	female	Age4									no
B0211	workergain	white	1	A	first	female	Age5									no
B0211	workergain	white	1	A	first	female	Age6									no
B0211	workergain	white	1	A	first	female	Age7	1	Day9	1	no	no	1			no
B0211	workergain	white	1	A	first	female	Age8									no
B0211	workergain	white	1	A	first	female	Age9									no
B0212	workergain	green	1	A	first	female	Age1									no
B0212	workergain	green	1	A	first	female	Age2	1	Day5	1	no	no	1			no
B0212	workergain	green	1	A	first	female	Age3	0	Day6	0				1		no
B0212	workergain	green	1	A	first	female	Age4	0	Day7	0						no
B0212	workergain	green	1	A	first	female	Age5	0	Day8	0						no
B0212	workergain	green	1	A	first	female	Age6	0	Day9	0						no
B0212	workergain	green	1	A	first	female	Age7									no
B0212	workergain	green	1	A	first	female	Age8									no
B0212	workergain	green	1	A	first	female	Age9									no
B0213	workergain	green	1	A	first	female	Age1									no
B0213	workergain	green	1	A	first	female	Age2	1	Day5	1	no	no	1			no
B0213	workergain	green	1	A	first	female	Age3	0	Day6	0				1		no
B0213	workergain	green	1	A	first	female	Age4	0	Day7	0						no
B0213	workergain	green	1	A	first	female	Age5	0	Day8	0						no
B0213	workergain	green	1	A	first	female	Age6	0	Day9	0						no
B0213	workergain	green	1	A	first	female	Age7									no
B0213	workergain	green	1	A	first	female	Age8									no
B0213	workergain	green	1	A	first	female	Age9									no
B0214	workergain	green	1	A	first	female	Age1									no
B0214	workergain	green	1	A	first	female	Age2	1	Day5	1	no	no	1			no
B0214	workergain	green	1	A	first	female	Age3	0	Day6	0				1		no
B0214	workergain	green	1	A	first	female	Age4	0	Day7	0						no
B0214	workergain	green	1	A	first	female	Age5	0	Day8	0						no
B0214	workergain	green	1	A	first	female	Age6	0	Day9	0						no
B0214	workergain	green	1	A	first	female	Age7									no
B0214	workergain	green	1	A	first	female	Age8									no
B0214	workergain	green	1	A	first	female	Age9									no
B0215	workergain	green	1	A	first	female	Age1									no
B0215	workergain	green	1	A	first	female	Age2	1	Day5	1	no	no	1			no
B0215	workergain	green	1	A	first	female	Age3	0	Day6	0				1		no
B0215	workergain	green	1	A	first	female	Age4	0	Day7	0						no
B0215	workergain	green	1	A	first	female	Age5	0	Day8	0						no
B0215	workergain	green	1	A	first	female	Age6	0	Day9	0						no
B0215	workergain	green	1	A	first	female	Age7									no
B0215	workergain	green	1	A	first	female	Age8									no
B0215	workergain	green	1	A	first	female	Age9									no
B0216	workergain	green	1	A	first	female	Age1									no
B0216	workergain	green	1	A	first	female	Age2	1	Day5	1	no	no	1			no
B0216	workergain	green	1	A	first	female	Age3	0	Day6	0				1		no
B0216	workergain	green	1	A	first	female	Age4	0	Day7	0						no
B0216	workergain	green	1	A	first	female	Age5									no
B0216	workergain	green	1	A	first	female	Age6	0	Day9	0						no
B0216	workergain	green	1	A	first	female	Age7									no
B0216	workergain	green	1	A	first	female	Age8									no
B0216	workergain	green	1	A	first	female	Age9									no
B0217	workergain	green	1	A	first	female	Age1									no
B0217	workergain	green	1	A	first	female	Age2	1	Day5	1	no	no	1			no
B0217	workergain	green	1	A	first	female	Age3	0	Day6	0				1		no
B0217	workergain	green	1	A	first	female	Age4	0	Day7	0						no
B0217	workergain	green	1	A	first	female	Age5	0	Day8	0						no
B0217	workergain	green	1	A	first	female	Age6	0	Day9	0						no
B0217	workergain	green	1	A	first	female	Age7									no
B0217	workergain	green	1	A	first	female	Age8									no
B0217	workergain	green	1	A	first	female	Age9									no
B0218	workergain	green	1	A	first	female	Age1									no
B0218	workergain	green	1	A	first	female	Age2	2	Day5	2	no	no	2			yes
B0218	workergain	green	1	A	first	female	Age3	1	Day6	1				1		no
B0218	workergain	green	1	A	first	female	Age4	1	Day7	1						no
B0218	workergain	green	1	A	first	female	Age5									no
B0218	workergain	green	1	A	first	female	Age6									no
B0218	workergain	green	1	A	first	female	Age7									no
B0218	workergain	green	1	A	first	female	Age8									no
B0218	workergain	green	1	A	first	female	Age9									no
B0219	workergain	green	1	A	first	female	Age1									no
B0219	workergain	green	1	A	first	female	Age2	1	Day5	1	no	no	1			no
B0219	workergain	green	1	A	first	female	Age3	0	Day6	0				1		no
B0219	workergain	green	1	A	first	female	Age4									no
B0219	workergain	green	1	A	first	female	Age5									no
B0219	workergain	green	1	A	first	female	Age6									no
B0219	workergain	green	1	A	first	female	Age7									no
B0219	workergain	green	1	A	first	female	Age8									no
B0219	workergain	green	1	A	first	female	Age9									no
B0220	workergain	green	1	A	first	female	Age1									no
B0220	workergain	green	1	A	first	female	Age2	1	Day5	1	no	no	1			no
B0220	workergain	green	1	A	first	female	Age3	0	Day6	0				1		no
B0220	workergain	green	1	A	first	female	Age4	0	Day7	0						no
B0220	workergain	green	1	A	first	female	Age5	0	Day8	0						no
B0220	workergain	green	1	A	first	female	Age6	0	Day9	0						no
B0220	workergain	green	1	A	first	female	Age7									no
B0220	workergain	green	1	A	first	female	Age8									no
B0220	workergain	green	1	A	first	female	Age9									no
B0221	workergain	green	1	A	first	female	Age1									no
B0221	workergain	green	1	A	first	female	Age2									no
B0221	workergain	green	1	A	first	female	Age3	1	Day6	1	no	no	1			no
B0221	workergain	green	1	A	first	female	Age4	0	Day7	0				1		no
B0221	workergain	green	1	A	first	female	Age5									no
B0221	workergain	green	1	A	first	female	Age6	0	Day9	0						no
B0221	workergain	green	1	A	first	female	Age7									no
B0221	workergain	green	1	A	first	female	Age8									no
B0221	workergain	green	1	A	first	female	Age9									no
B0222	workergain	green	1	A	first	female	Age1									no
B0222	workergain	green	1	A	first	female	Age2									no
B0222	workergain	green	1	A	first	female	Age3	1	Day6	1	no	no	1			no
B0222	workergain	green	1	A	first	female	Age4	0	Day7	0				1		no
B0222	workergain	green	1	A	first	female	Age5	0	Day8	0						no
B0222	workergain	green	1	A	first	female	Age6	0	Day9	0						no
B0222	workergain	green	1	A	first	female	Age7									no
B0222	workergain	green	1	A	first	female	Age8									no
B0222	workergain	green	1	A	first	female	Age9									no
B0223	workergain	green	1	A	first	female	Age1									no
[truncated: 61,631 more rows]

## Sheet: Exp3
colony	Yard	Operation	Treatment	month	PercentDrones	PercentWorker	PercentMitesAlcohol	MitesInAlcohol	TotalBeesAlcohol	WorkersInAlcohol	DronesInAlcohol	NumberMitesDroneHand	DronesHand	PerCDroneHand
y1	Y	OperationA	1	may	0.0149254	0.985075	0	0	402	396	6	0	42	0
y1	Y	OperationA	1	june	0.0777778	0.922222	0.00277778	1	360	332	28
y1	Y	OperationA	1	july	0.102804	0.897196	0.00311526	1	321	288	33
y1	Y	OperationA	1	august	0.00837989	0.99162	0	0	358	355	3
Y 02	Y	OperationA	1	may	0.0177515	0.982249	0.00887574	3	338	332	6	0	31	0
Y 02	Y	OperationA	1	june	0.0615764	0.938424	0	0	406	381	25
Y 02	Y	OperationA	1	july	0.158249	0.841751	0	0	297	250	47
Y 02	Y	OperationA	1	august	0.0217391	0.978261	0.00362319	1	276	270	6
Y 09	Y	OperationA	1	may	0.0023753	0.997625	0	0	421	420	1	0	44	0
Y 09	Y	OperationA	1	june	0.0104987	0.989501	0	0	381	377	4
Y 09	Y	OperationA	1	july	0.00298507	0.997015	0.00298507	1	335	334	1
Y 09	Y	OperationA	1	august	0.0001	1	0.0134228	4	298	298	0.0001
Y 18	Y	OperationA	1	may	0.00946372	0.990536	0.00315457	1	317	314	3	0	32	0
Y 18	Y	OperationA	1	june	0.0375	0.9625	0	0	400	385	15
Y 18	Y	OperationA	1	july	0.0479233	0.952077	0.0447284	14	313	298	15
Y 18	Y	OperationA	1	august	0.0001	1	0	0	35	35	0.0001
Y 24	Y	OperationA	1	may	0.00316456	0.996835	0	0	316	315	1	0	25	0
Y 24	Y	OperationA	1	june	0.00932401	0.990676	0	0	429	425	4
Y 24	Y	OperationA	1	july	0.0136986	0.986301	0	0	292	288	4
Y 24	Y	OperationA	1	august	0.0030581	0.996942	0.0030581	1	327	326	1
B 01	B	OperationA	1	may	0.00600601	0.993994	0	0	333	331	2	0	92	0
B 01	B	OperationA	1	june	0.0308642	0.969136	0	0	324	314	10
B 01	B	OperationA	1	july	0.0471698	0.95283	0	0	318	303	15
B 01	B	OperationA	1	august	0.00749064	0.992509	0.00374532	1	267	265	2
B 12	B	OperationA	1	may	0.00273973	0.99726	0	0	365	364	1	0	52	0
B 12	B	OperationA	1	june	0.0263158	0.973684	0	0	342	333	9
B 12	B	OperationA	1	july	0.0324675	0.967532	0	0	308	298	10
B 12	B	OperationA	1	august	0.00593472	0.994065	0.00593472	2	337	335	2
B 5-12-24	B	OperationA	1	may	0.0001	1	0	0	376	376	0.0001	0	9	0
B 5-12-24	B	OperationA	1	june	0.0001	1	0	0	355	355	0.0001
B 5-12-24	B	OperationA	1	july	0.00290698	0.997093	0	0	344	343	1
B 5-12-24	B	OperationA	1	august	0.00322581	0.996774	0	0	310	309	1
B B1	B	OperationA	1	may	0.0120482	0.987952	0	0	332	328	4	0	32	0
B B1	B	OperationA	1	june	0.00858369	0.991416	0	0	233	231	2
B B1	B	OperationA	1	july	0.0404412	0.959559	0	0	272	261	11
B B2	B	OperationA	1	may	0.00268096	0.997319	0	0	373	372	1	0	13	0
B B2	B	OperationA	1	june	0.00909091	0.990909	0	0	330	327	3
B B2	B	OperationA	1	july	0.0212121	0.978788	0	0	330	323	7
B B2	B	OperationA	1	august	0.00682594	0.993174	0.00341297	1	293	291	2
B B3	B	OperationA	1	may	0.0075188	0.992481	0	0	399	396	3	0	10	0
B B3	B	OperationA	1	june	0.0140449	0.985955	0	0	356	351	5
B B3	B	OperationA	1	july	0.0393939	0.960606	0	0	330	317	13
B B3	B	OperationA	1	august	0.0001	1	0	0	329	329	0.0001
A 01	A	OperationA	1	may	0.015873	0.984127	0	0	315	310	5
A 01	A	OperationA	1	june	0.0983051	0.901695	0.00338983	1	295	266	29
A 01	A	OperationA	1	july	0.136364	0.863636	0.0034965	1	286	247	39
A 01	A	OperationA	1	august	0.0286738	0.971326	0.0179211	5	279	271	8
A 02	A	OperationA	1	may	0.00295858	0.997041	0	0	338	337	1
A 02	A	OperationA	1	june	0.0217984	0.978202	0.0027248	1	367	359	8
A 02	A	OperationA	1	july	0.0160428	0.983957	0.0160428	6	374	368	6
A 02	A	OperationA	1	august	0.0001	1	0.0977011	34	348	348	0.0001
A 07	A	OperationA	1	may	0.00337838	0.996622	0.00337838	1	296	295	1
A 07	A	OperationA	1	june	0.0460251	0.953975	0.0041841	1	239	228	11
A 07	A	OperationA	1	july	0.0939597	0.90604	0.00335571	1	298	270	28
A 07	A	OperationA	1	august	0.0001	1	0.030303	10	330	330	0.0001
A 08	A	OperationA	1	may	0.00874636	0.991254	0	0	343	340	3
A 08	A	OperationA	1	june	0.0336788	0.966321	0.00518135	2	386	373	13
A 08	A	OperationA	1	july	0.0269461	0.973054	0.011976	4	334	325	9
A 08	A	OperationA	1	august	0.00607903	0.993921	0.0516717	17	329	327	2
A 17	A	OperationA	1	may	0.00609756	0.993902	0	0	328	326	2
A 17	A	OperationA	1	june	0.105572	0.894428	0.0322581	11	341	305	36
A 17	A	OperationA	1	july	0.0263852	0.973615	0.0738786	28	379	369	10
A 17	A	OperationA	1	august	0.00278552	0.997214	0.111421	40	359	358	1
A 20	A	OperationA	1	may	0.0477816	0.952218	0.00682594	2	293	279	14
A 20	A	OperationA	1	june	0.027027	0.972973	0.0135135	5	370	360	10
A 20	A	OperationA	1	july	0.0077821	0.992218	0.0389105	10	257	255	2
A 20	A	OperationA	1	august	0.003125	0.996875	0.121875	39	320	319	1
A 23	A	OperationA	1	may	0.0264151	0.973585	0	0	265	258	7
A 23	A	OperationA	1	june	0.0001	1	0	0	393	393	0.0001
A 23	A	OperationA	1	july	0.0001	1	0	0	348	348	0.0001
A 23	A	OperationA	1	august	0.00626959	0.99373	0.00626959	2	319	317	2
A 25	A	OperationA	1	may	0.0130719	0.986928	0	0	306	302	4
A 25	A	OperationA	1	june	0.0415094	0.958491	0	0	265	254	11
A 25	A	OperationA	1	july	0.003125	0.996875	0	0	320	319	1
A 25	A	OperationA	1	august	0.00645161	0.993548	0.016129	5	310	308	2
BHM N1	BHM	OperationA	1	may	0.0001	1	0	0	342	342	0.0001
BHM N1	BHM	OperationA	1	june	0.0001	1	0	0	273	273	0.0001
BHM C	BHM	OperationA	1	may	0.0184049	0.981595	0	0	326	320	6	0	47	0
BHM C	BHM	OperationA	1	june	0.0488506	0.951149	0	0	348	331	17
BHM C	BHM	OperationA	1	july	0.0344828	0.965517	0	0	290	280	10
BHM C	BHM	OperationA	1	august	0.0174927	0.982507	0	0	343	337	6
BHM 22 - 06	BHM	OperationA	1	may	0.0202899	0.97971	0	0	345	338	7	0	21	0
BHM 22 - 06	BHM	OperationA	1	june	0.00478469	0.995215	0	0	418	416	2
BHM 22 - 06	BHM	OperationA	1	july	0.00802139	0.991979	0	0	374	371	3
BHM 22 - 06	BHM	OperationA	1	august	0.00294118	0.997059	0.00294118	1	340	339	1
BHM 03	BHM	OperationA	1	may	0.0144092	0.985591	0	0	347	342	5	0	22	0
BHM 03	BHM	OperationA	1	june	0.0383275	0.961672	0	0	287	276	11
BHM 03	BHM	OperationA	1	july	0.0351562	0.964844	0.00390625	1	256	247	9
BHM 03	BHM	OperationA	1	august	0.0280702	0.97193	0	0	285	277	8
BHM 20	BHM	OperationA	1	may	0.0001	1	0	0	300	300	0.0001	0	3	0
BHM 20	BHM	OperationA	1	june	0.0001	1	0	0	364	364	0.0001
BHM 20	BHM	OperationA	1	july	0.0170068	0.982993	0	0	294	289	5
BHM 20	BHM	OperationA	1	august	0.00322581	0.996774	0	0	310	309	1
BHM 17	BHM	OperationA	1	may	0.0001	1	0	0	259	259	0.0001
BHM 17	BHM	OperationA	1	june	0.0120968	0.987903	0	0	248	245	3
BHM 17	BHM	OperationA	1	july	0.0119048	0.988095	0	0	252	249	3
BHM 17	BHM	OperationA	1	august	0.0519031	0.948097	0	0	289	274	15
BHM B	BHM	OperationA	1	may	0.0104167	0.989583	0	0	288	285	3	0	6	0
BHM B	BHM	OperationA	1	june	0.0514469	0.948553	0	0	311	295	16
BHM B	BHM	OperationA	1	july	0.0208333	0.979167	0	0	288	282	6
BHM B	BHM	OperationA	1	august	0.0103093	0.989691	0	0	388	384	4
M 7G	M	OperationA	1	may	0.005291	0.994709	0	0	378	376	2	0	63	0
M 7G	M	OperationA	1	june	0.0335917	0.966408	0	0	387	374	13
M 7G	M	OperationA	1	july	0.00917431	0.990826	0.00917431	3	327	324	3
M 7G	M	OperationA	1	august	0.00287356	0.997126	0.0287356	10	348	347	1
M 18G	M	OperationA	1	may	0.0557377	0.944262	0	0	305	288	17	0	50	0
M 18G	M	OperationA	1	june	0.0246479	0.975352	0	0	284	277	7
M 18G	M	OperationA	1	july	0.0037594	0.996241	0	0	266	265	1
M 18G	M	OperationA	1	august	0.0137615	0.986239	0.00917431	2	218	215	3
M 19G	M	OperationA	1	may	0.0001	1	0	0	382	382	0.0001
M 19G	M	OperationA	1	june	0.0973684	0.902632	0.00263158	1	380	343	37
M 19G	M	OperationA	1	july	0.0001	1	0.0369393	14	379	379	0.0001
M 19G	M	OperationA	1	august	0.00393701	0.996063	0.0708661	18	254	253	1
M 21G	M	OperationA	1	may	0.0222222	0.977778	0	0	360	352	8	1	19	0.0526316
M 21G	M	OperationA	1	june	0.0610687	0.938931	0	0	262	246	16
M 21G	M	OperationA	1	july	0.0487805	0.95122	0	0	287	273	14
M 21G	M	OperationA	1	august	0.00355872	0.996441	0.00711744	2	281	280	1
M 25	M	OperationA	1	may	0.00292398	0.997076	0.00292398	1	342	341	1	1	32	0.03125
M 25	M	OperationA	1	june	0.0103896	0.98961	0.0025974	1	385	381	4
M 25	M	OperationA	1	july	0.00561798	0.994382	0.0589888	21	356	354	2
M 25	M	OperationA	1	august	0.0001	1	0.106312	32	301	301	0.0001
Home 1	Home	OperationB	0	may	0.0113208	0.988679	0.00377358	1	265	262	3	1	14	0.0714286
Home 1	Home	OperationB	0	june	0.0310345	0.968966	0.0172414	5	290	281	9
Home 1	Home	OperationB	0	july	0.00277778	0.997222	0.0166667	6	360	359	1
Home 1	Home	OperationB	0	august	0.0337423	0.966258	0.00920245	3	326	315	11
Home 2	Home	OperationB	0	may	0.0189274	0.981073	0.0157729	5	317	311	6	3	31	0.0967742
Home 2	Home	OperationB	0	june	0.04534	0.95466	0.0201511	8	397	379	18
Home 2	Home	OperationB	0	july	0.0454545	0.954545	0.0727273	24	330	315	15
Home 2	Home	OperationB	1	august	0.00917431	0.990826	0	0	327	324	3
Home 3	Home	OperationB	0	may	0.117647	0.882353	0.00928793	3	323	285	38	2	25	0.08
Home 3	Home	OperationB	0	june	0.0444965	0.955504	0.00702576	3	427	408	19
Home 3	Home	OperationB	0	july	0.0165289	0.983471	0.0743802	27	363	357	6
Home 3	Home	OperationB	1	august	0.0001	1	0	0	361	361	0.0001
Home 4	Home	OperationB	0	may	0.00692841	0.993072	0	0	433	430	3	0	20	0
Home 4	Home	OperationB	0	june	0.039801	0.960199	0.00995025	4	402	386	16
Home 4	Home	OperationB	0	july	0.0001	1	0.00311526	1	321	321	0.0001
Home 4	Home	OperationB	0	august	0.00294985	0.99705	0	0	339	338	1
Home 5	Home	OperationB	0	may	0.0401338	0.959866	0.0301003	9	299	287	12	5	33	0.151515
Home 5	Home	OperationB	0	june	0.0401003	0.9599	0.0952381	38	399	383	16
Home 5	Home	OperationB	1	july	0.0112676	0.988732	0.0253521	9	355	351	4
Home 5	Home	OperationB	1	august	0.00273224	0.997268	0.0218579	8	366	365	1
River 6	River	OperationB	0	may	0.045584	0.954416	0.017094	6	351	335	16	3	38	0.0789474
River 6	River	OperationB	0	june	0.0105263	0.989474	0.00789474	3	380	376	4
River 6	River	OperationB	0	july	0.0503356	0.949664	0.0973154	29	298	283	15
River 6	River	OperationB	1	august	0.00909091	0.990909	0.00909091	3	330	327	3
River 7	River	OperationB	0	may	0.00673401	0.993266	0.010101	3	297	295	2	0	3	0
River 7	River	OperationB	0	june	0.0001	1	0.01373	6	437	437	0.0001
River 7	River	OperationB	0	july	0.0280374	0.971963	0.0249221	8	321	312	9
River 7	River	OperationB	0	august	0.0164835	0.983516	0.104396	38	364	358	6
River 8	River	OperationB	0	may	0.081761	0.918239	0	0	318	292	26	0	0
River 8	River	OperationB	0	june	0.0378619	0.962138	0.00890869	4	449	432	17
River 8	River	OperationB	0	july	0.034375	0.965625	0.003125	1	320	309	11
River 8	River	OperationB	0	august	0.0001	1	0.0168067	6	357	357	0.0001
River 9	River	OperationB	0	may	0.00872093	0.991279	0.0203488	7	344	341	3	1	5	0.2
River 9	River	OperationB	0	june	0.0021645	0.997835	0.025974	12	462	461	1
River 9	River	OperationB	0	july	0.00291545	0.997085	0.00874636	3	343	342	1
River 9	River	OperationB	0	august	0.0214724	0.978528	0.0981595	32	326	319	7
River 10	River	OperationB	0	may	0.00925926	0.990741	0.00308642	1	324	321	3	0	7	0
River 10	River	OperationB	0	june	0.00987654	0.990123	0	0	405	401	4
River 10	River	OperationB	0	july	0.0162866	0.983713	0.00325733	1	307	302	5
River 10	River	OperationB	0	august	0.00743494	0.992565	0.0148699	4	269	267	2
Clay 11	Clay	OperationB	0	may	0.0924658	0.907534	0	0	292	265	27	0	30	0
Clay 11	Clay	OperationB	0	june	0.0129534	0.987047	0	0	386	381	5
Clay 11	Clay	OperationB	0	july	0.0676157	0.932384	0.00711744	2	281	262	19
Clay 11	Clay	OperationB	0	august	0.0484848	0.951515	0.00909091	3	330	314	16
Clay 12	Clay	OperationB	0	may	0.079096	0.920904	0.0508475	18	354	326	28	10	21	0.47619
Clay 12	Clay	OperationB	0	june	0.0162602	0.98374	0.0677507	25	369	363	6
Clay 12	Clay	OperationB	1	july	0.010989	0.989011	0.0604396	22	364	360	4
Clay 12	Clay	OperationB	1	august	0.0186335	0.981366	0.00621118	2	322	316	6
Clay 13	Clay	OperationB	0	may	0.0866426	0.913357	0.0108303	3	277	253	24	2	19	0.105263
Clay 13	Clay	OperationB	0	june	0.0164384	0.983562	0.0109589	4	365	359	6
Clay 13	Clay	OperationB	0	july	0.090379	0.909621	0.0641399	22	343	312	31
Clay 13	Clay	OperationB	1	august	0.054878	0.945122	0.0396341	13	328	310	18
Clay 14	Clay	OperationB	0	may	0.003003	0.996997	0.012012	4	333	332	1	2	10	0.2
Clay 14	Clay	OperationB	0	june	0.00923077	0.990769	0.0215385	7	325	322	3
Clay 14	Clay	OperationB	0	july	0.0614887	0.938511	0.0194175	6	309	290	19
Clay 14	Clay	OperationB	0	august	0.02	0.98	0.14	42	300	294	6
Clay 15	Clay	OperationB	0	may	0.00959233	0.990408	0.0167866	7	417	413	4	2	23	0.0869565
Clay 15	Clay	OperationB	0	june	0.0311615	0.968839	0.01983	7	353	342	11
Clay 15	Clay	OperationB	0	july	0.0159236	0.984076	0.0923567	29	314	309	5
Clay 15	Clay	OperationB	1	august	0.00719425	0.992806	0.0215827	6	278	276	2
